# Supplementary material
Source: PubMed Central journal article supplement (PMC2798903)

# **Perylenequinone Natural Products: Enantioselective Synthesis of the Oxidized Pentacyclic Core**

Carol A. Mulrooney, Barbara J. Morgan, Xiaolin Li and Marisa C. Kozlowski\*

*Department of Chemistry, Roy and Diana Vagelos Laboratories, University of Pennsylvania,  
Philadelphia, Pennsylvania 19104*

*Supporting Information, Part 2*

|                                            |                |
|--------------------------------------------|----------------|
| <b>Spectral Data of Intermediates</b>      | <b>S32-S86</b> |
| <b>Spectral Data of Perylenequinone 39</b> | <b>S87-S89</b> |



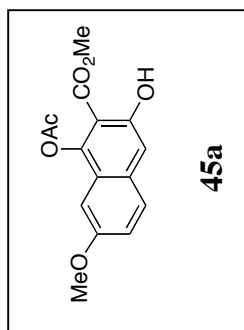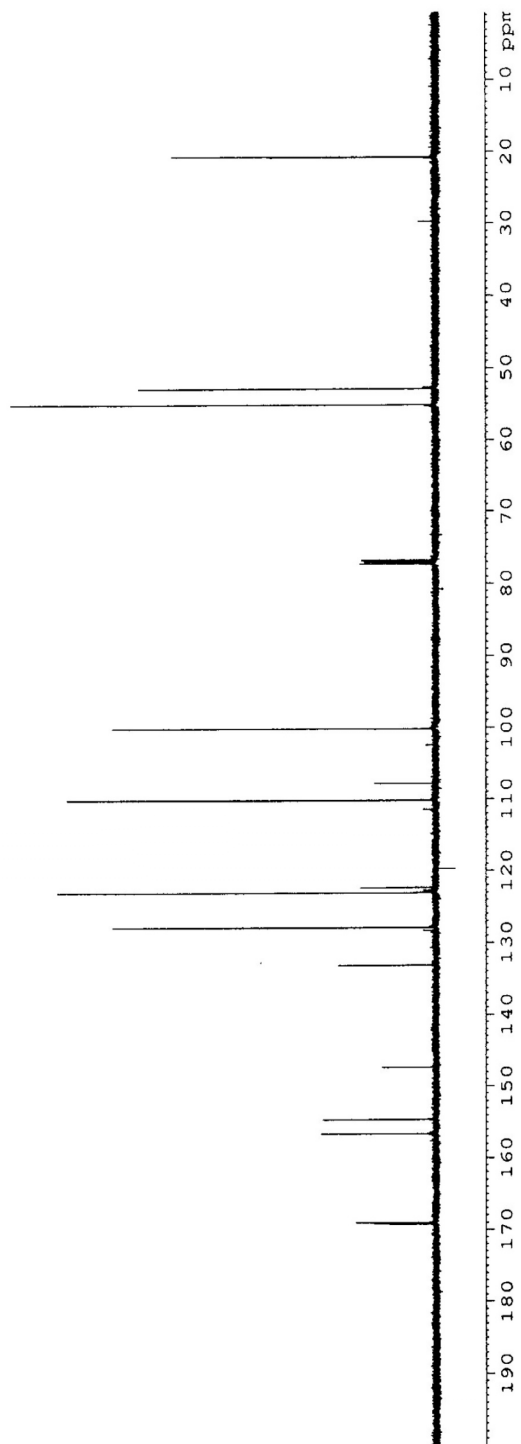

**Scheme 8.** 125 MHz <sup>13</sup>C NMR Spectrum of Compound **45a** in CDCl<sub>3</sub>



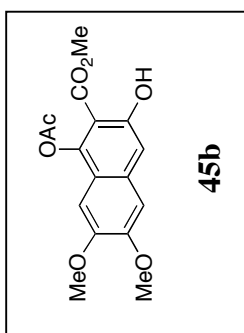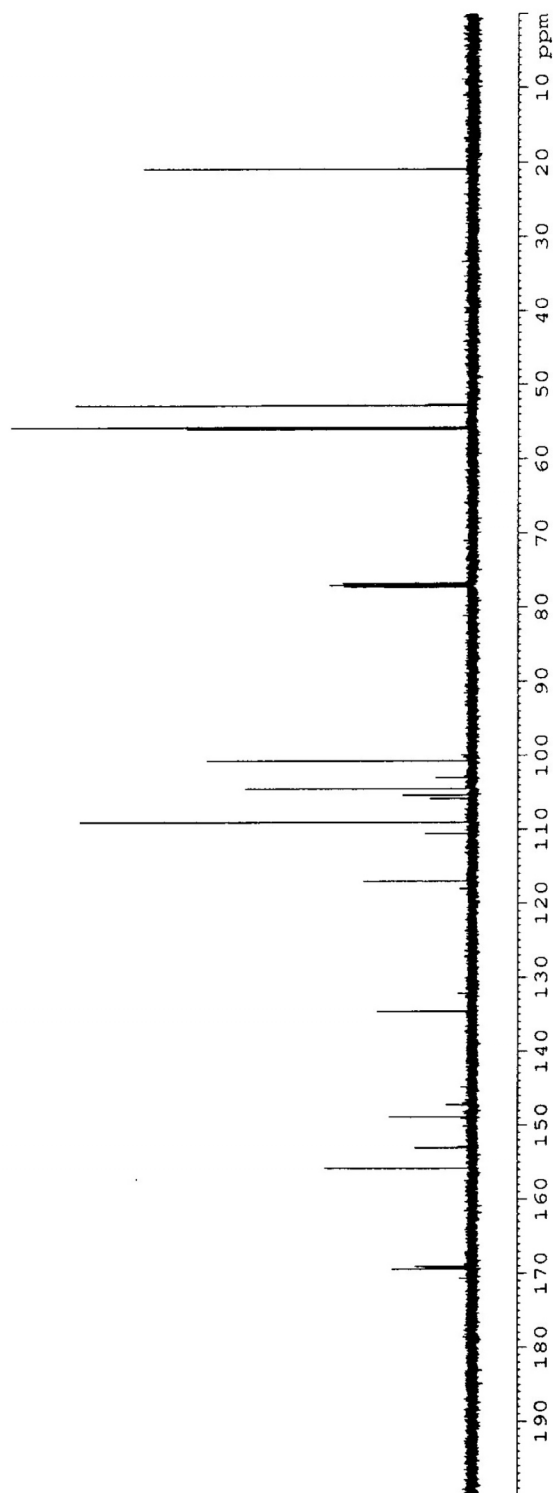

**Scheme 8.** 125 MHz <sup>13</sup>C NMR Spectrum of Compound **45b** in CDCl<sub>3</sub>

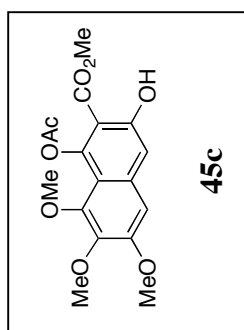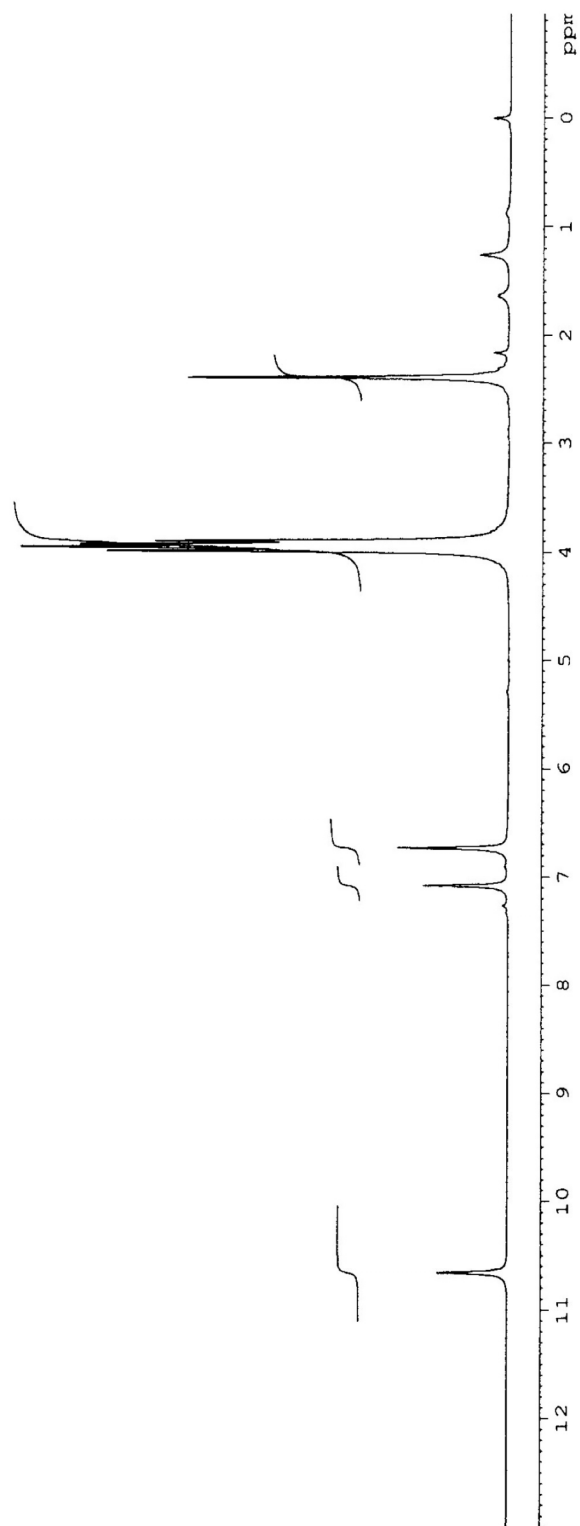

**Scheme 8.** 500 MHz <sup>1</sup>H NMR Spectrum of Compound **45c** in CDCl<sub>3</sub>

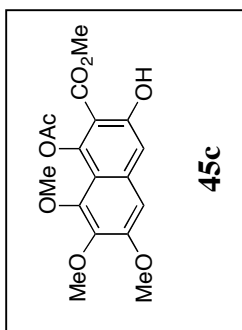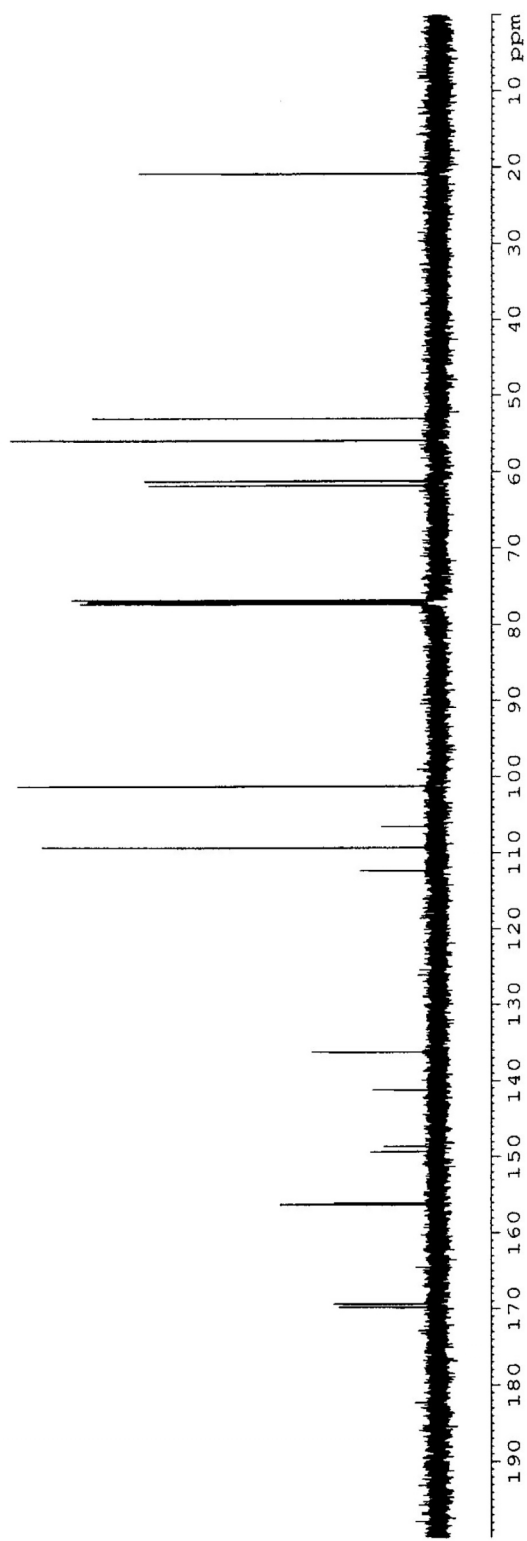

**Scheme 8.** 125 MHz <sup>13</sup>C NMR Spectrum of Compound **45c** in CDCl<sub>3</sub>

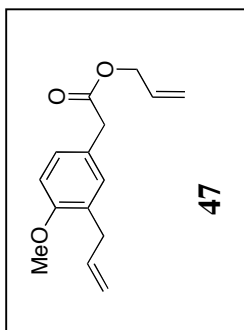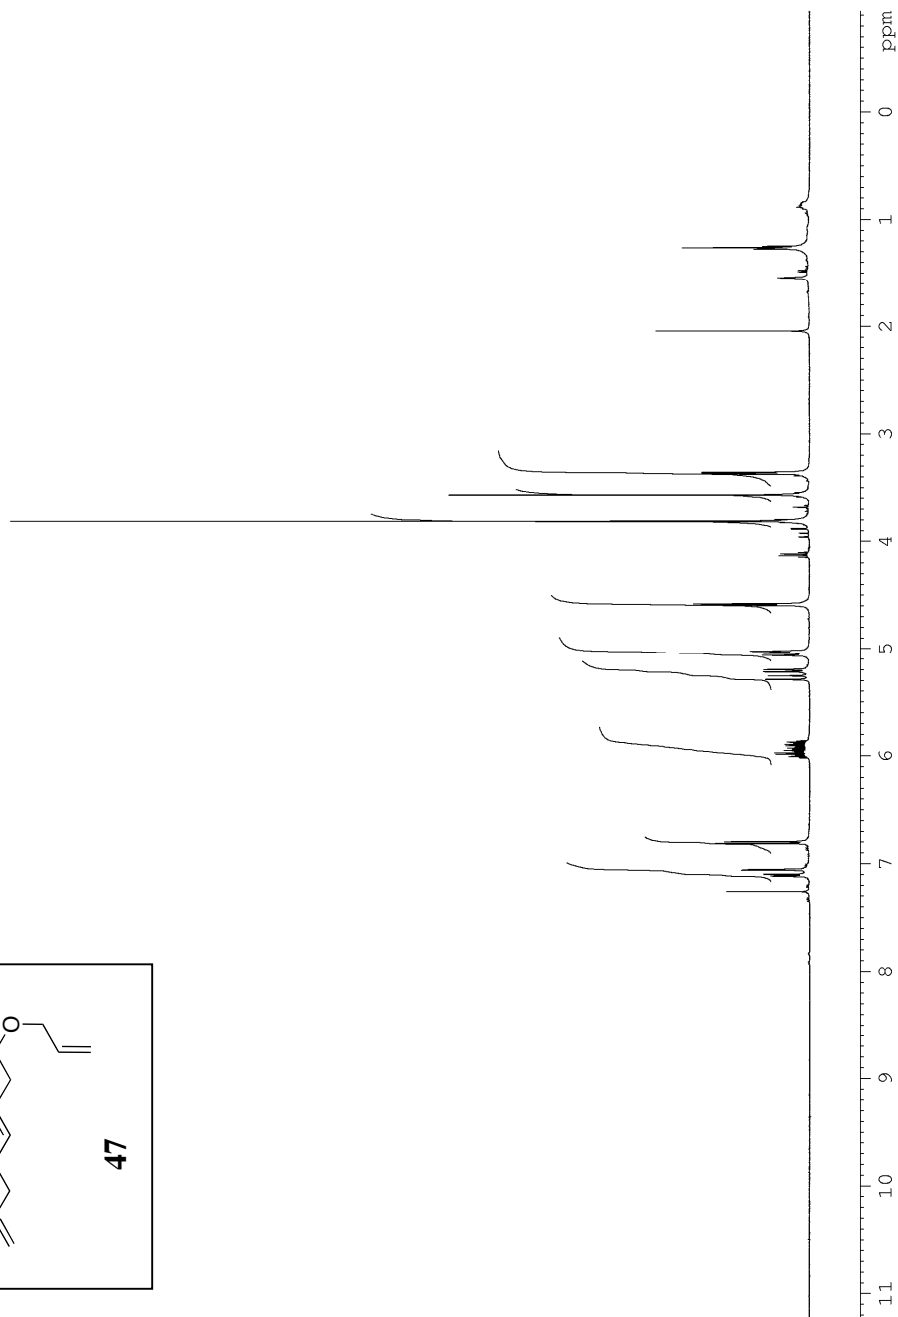

**Scheme 9.** 360 MHz <sup>1</sup>H NMR Spectrum of Compound **47** in CDCl<sub>3</sub>



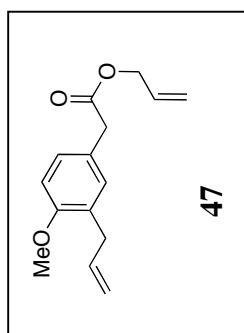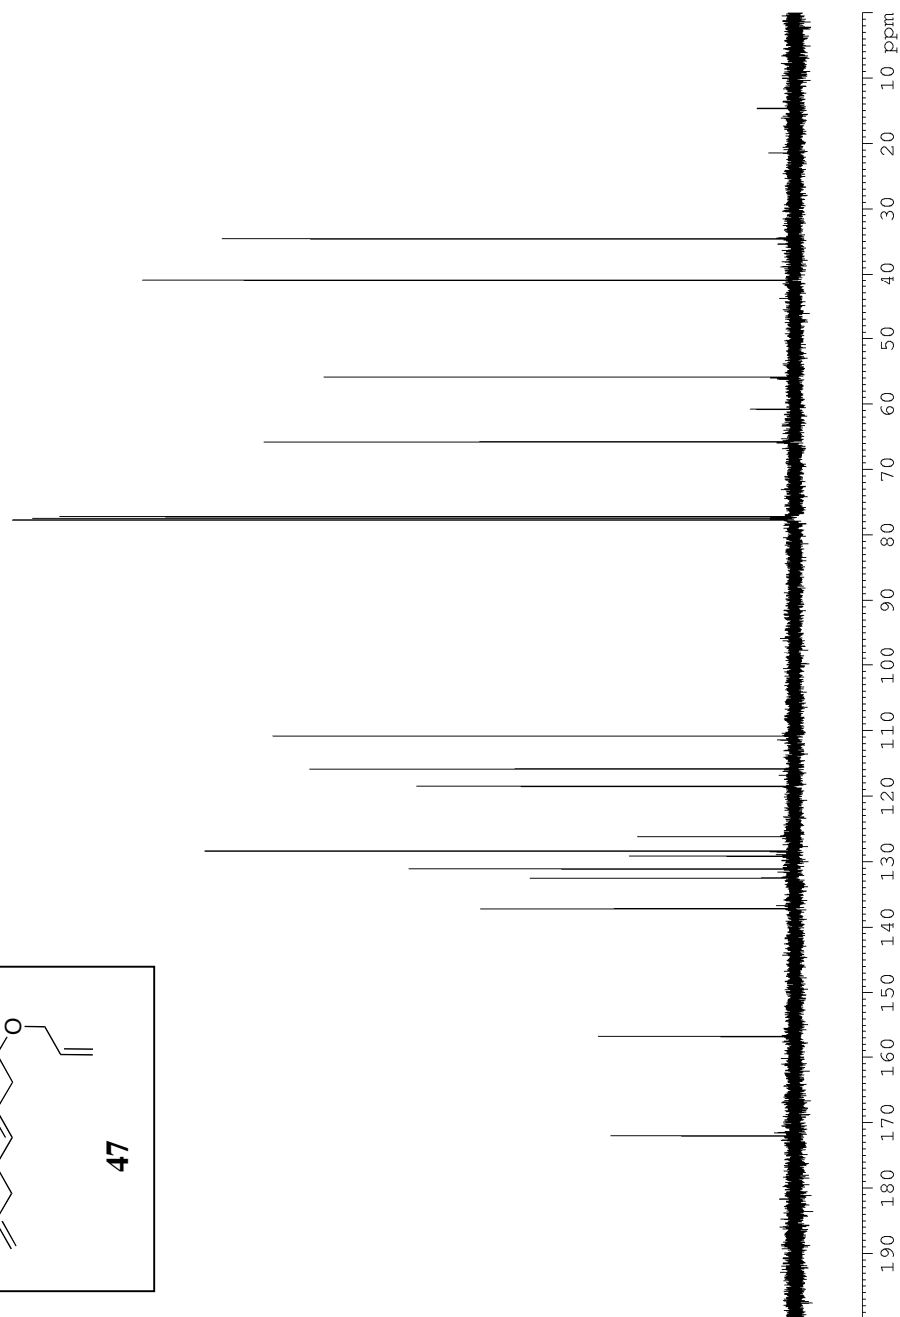

**Scheme 9.** 125 MHz <sup>13</sup>C NMR Spectrum of Compound **47** in CDCl<sub>3</sub>

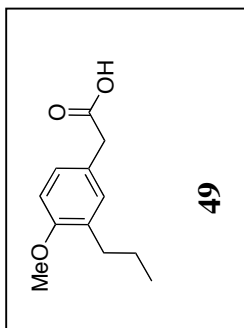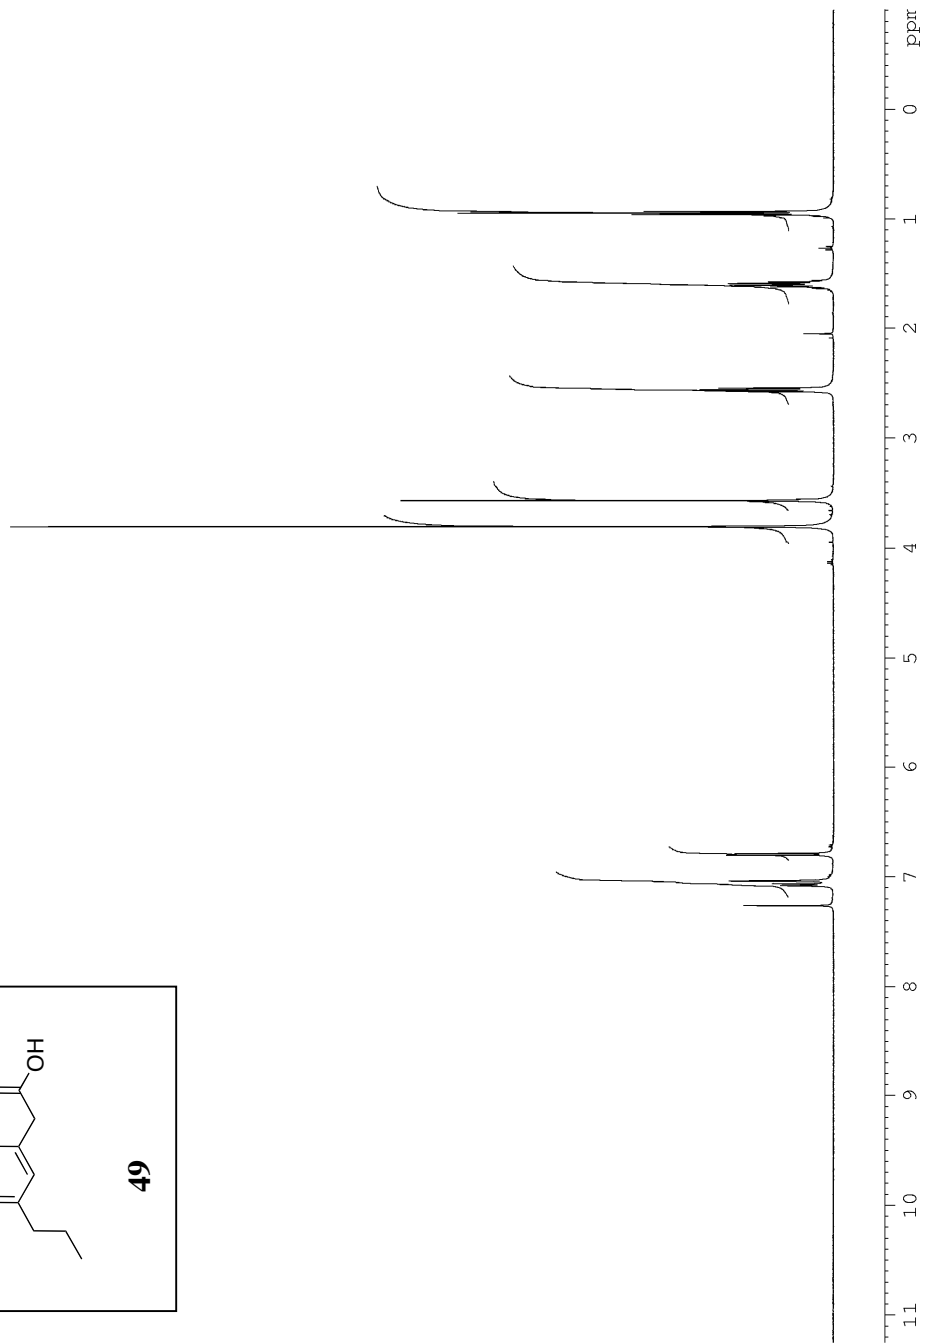

**Scheme 9.** 500 MHz  $^1\text{H}$  NMR Spectrum of Compound **49** in  $\text{CDCl}_3$

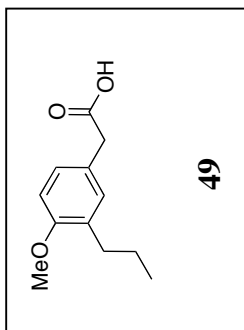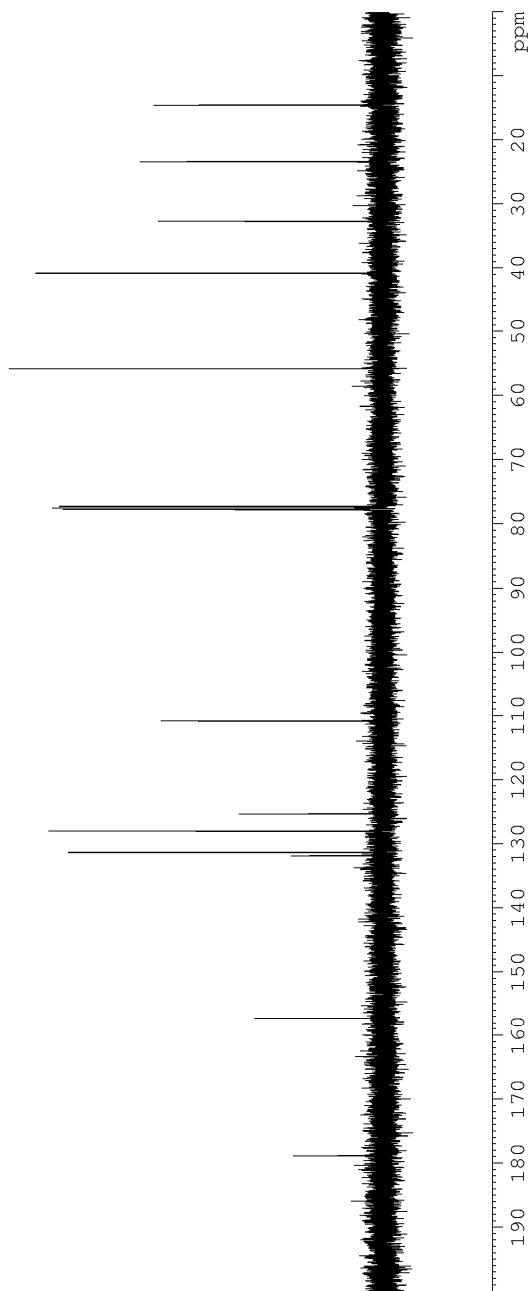

**Scheme 9.** 125 MHz <sup>13</sup>C NMR Spectrum of Compound **49** in CDCl<sub>3</sub>

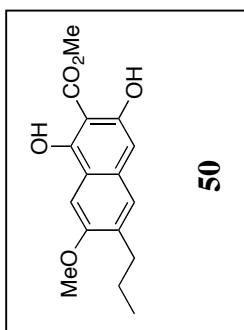

**50**

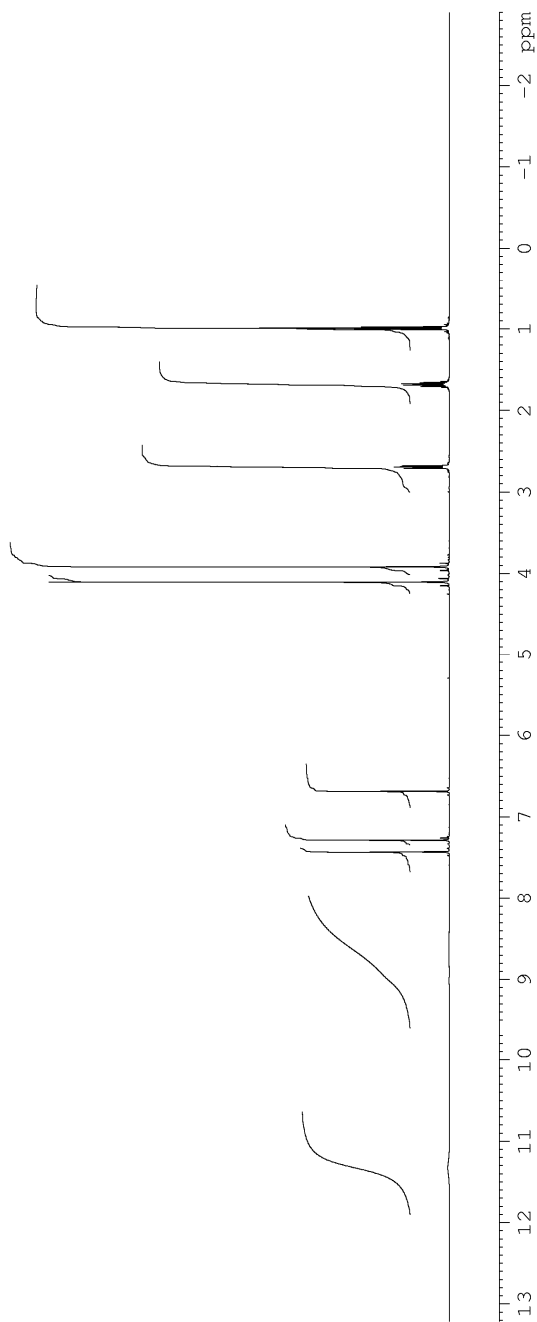

**Scheme 9.** 500 MHz <sup>1</sup>H NMR Spectrum of Compound **50** in CDCl<sub>3</sub>

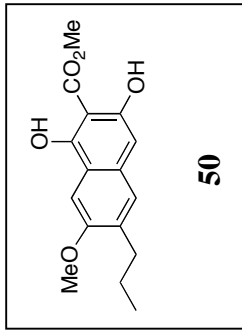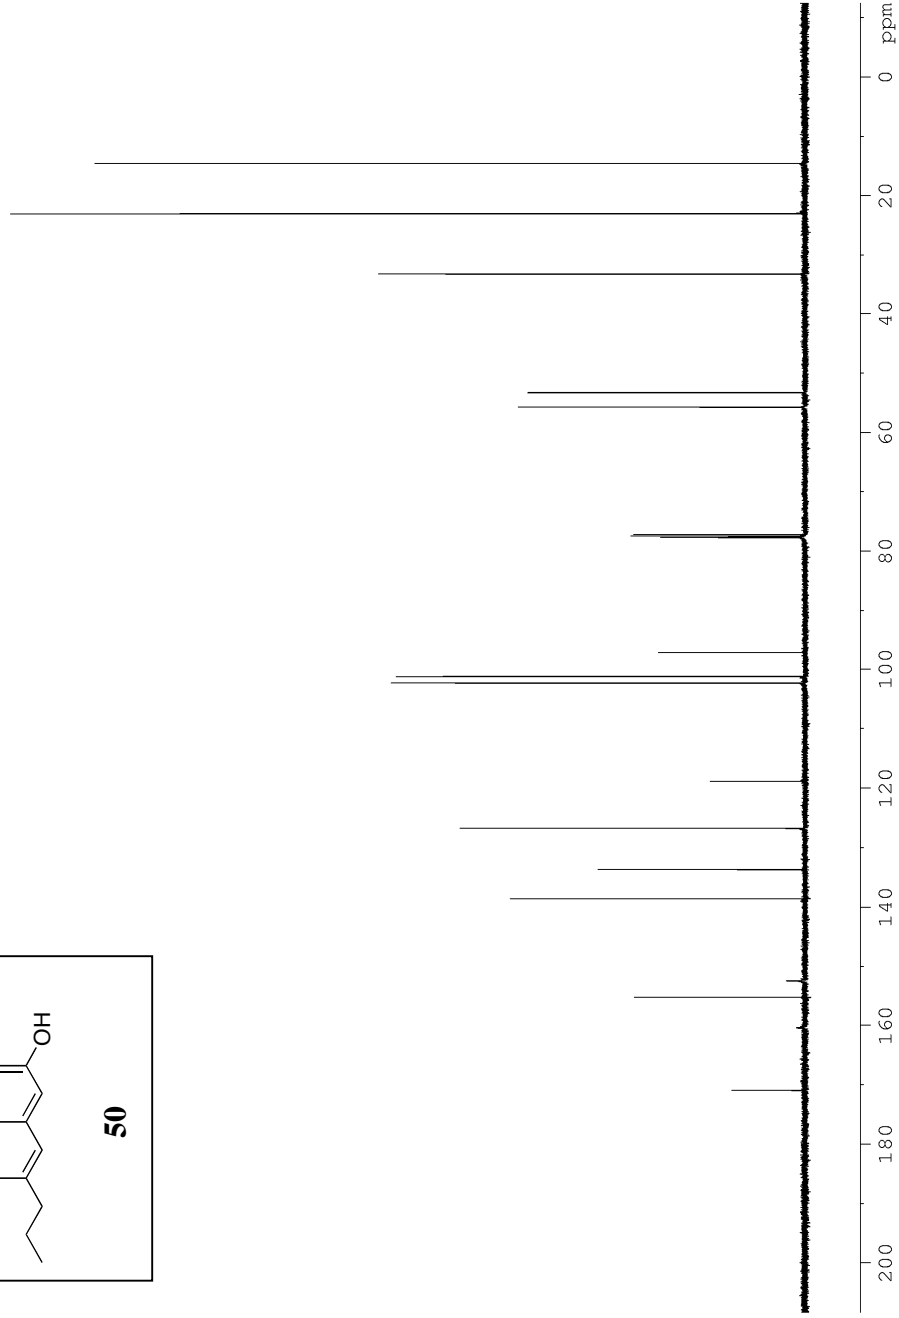

**Scheme 9.** 125 MHz  $^{13}\text{C}$  NMR Spectrum of Compound **50** in  $\text{CDCl}_3$

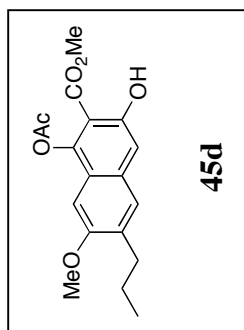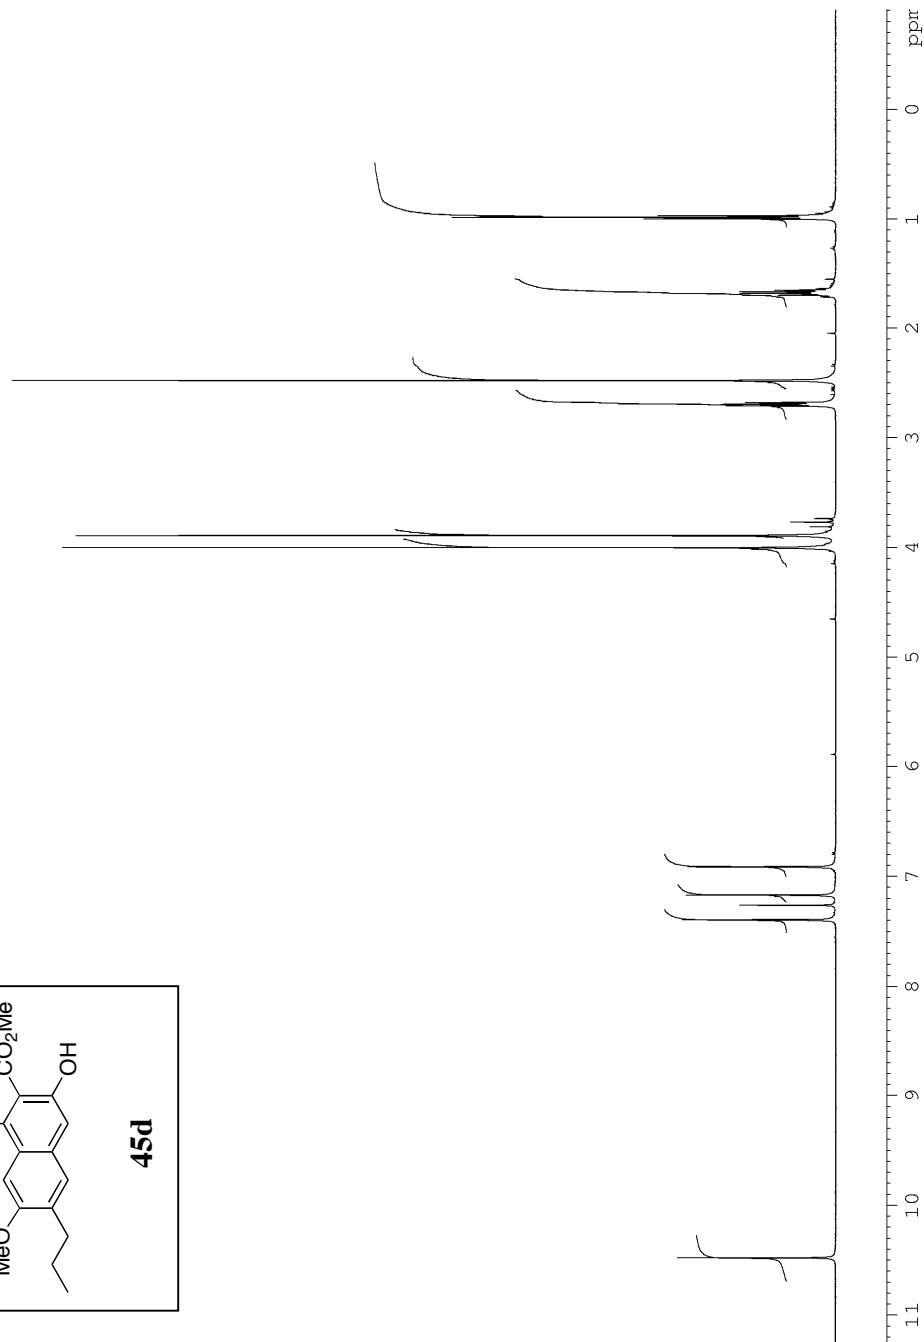

**Scheme 9.** 500 MHz <sup>1</sup>H NMR Spectrum of Compound **45d** in CDCl<sub>3</sub>

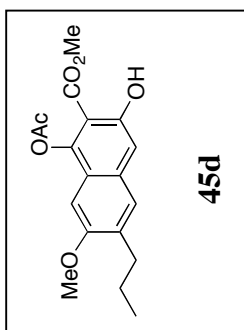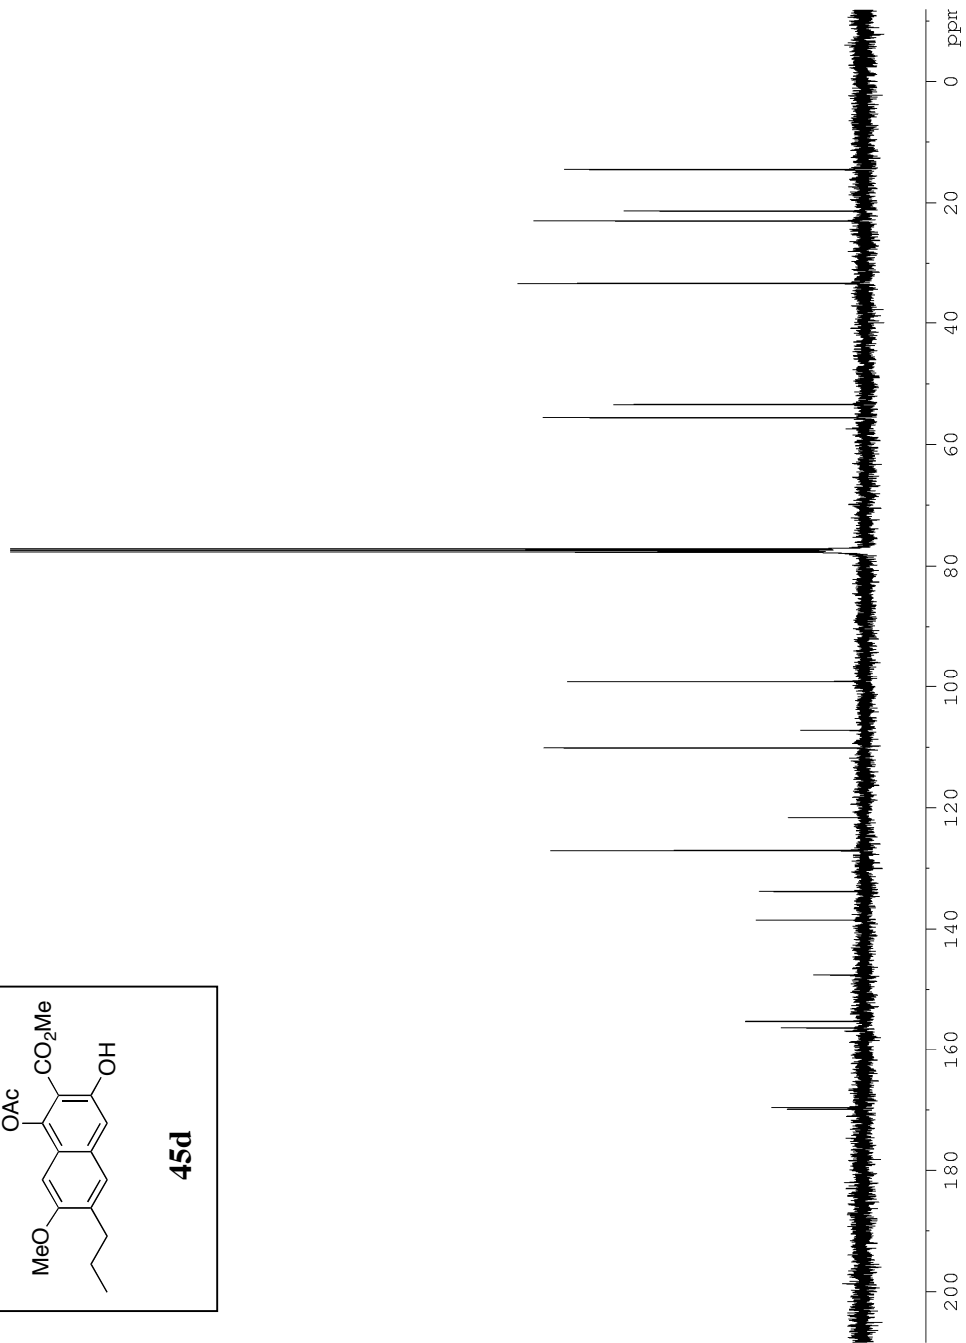

**Scheme 9.** 125 MHz <sup>13</sup>C NMR Spectrum of Compound **45d** in CDCl<sub>3</sub>

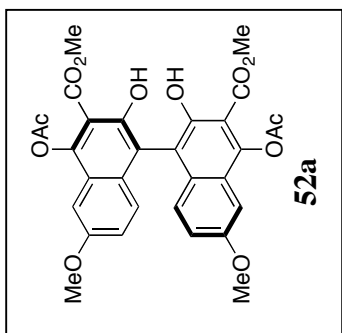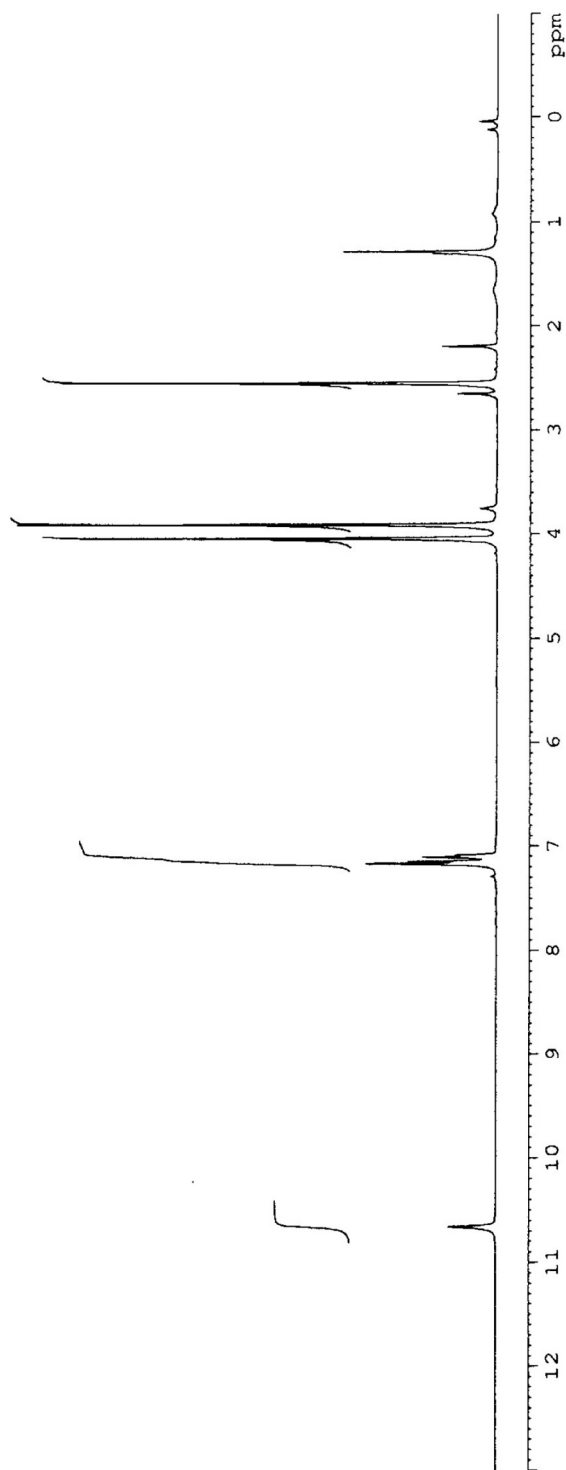

**Table 1.** 500 MHz  $^1\text{H}$  NMR Spectrum of Compound **52a** in  $\text{CDCl}_3$



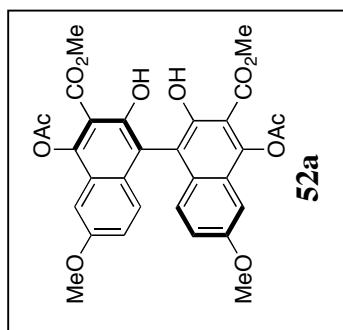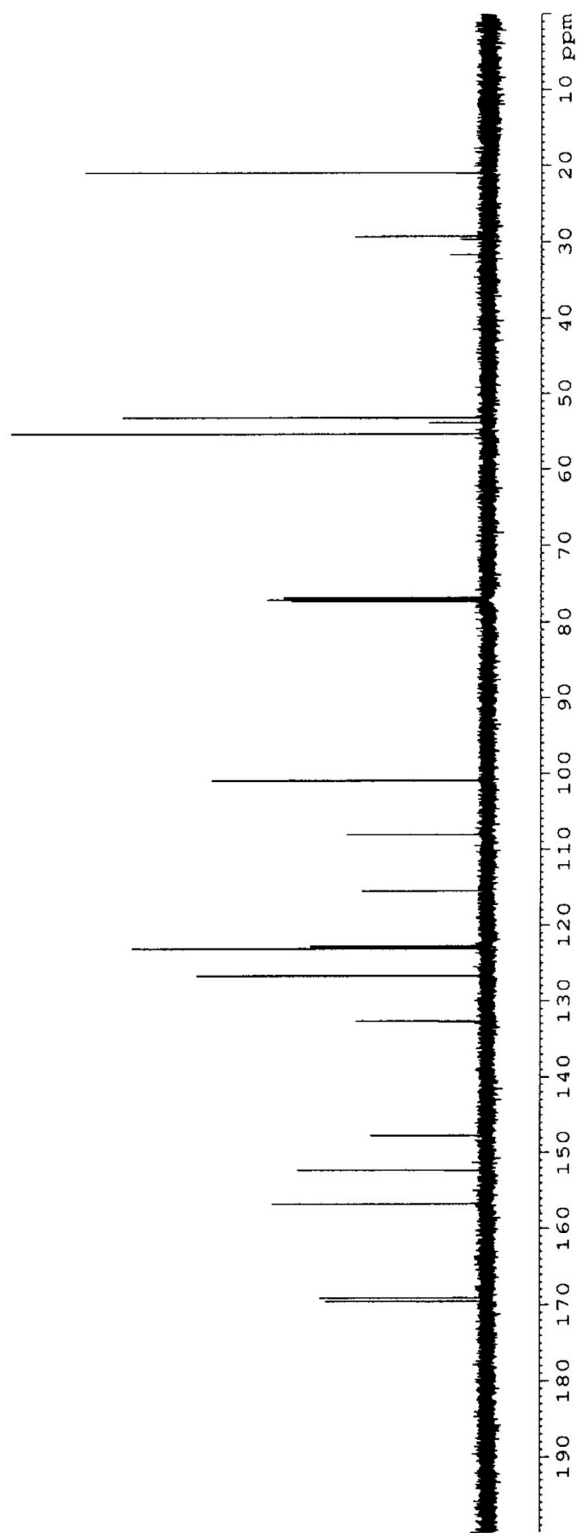

**Table 1.** 125 MHz  $^{13}\text{C}$  NMR Spectrum of Compound **52a** in  $\text{CDCl}_3$



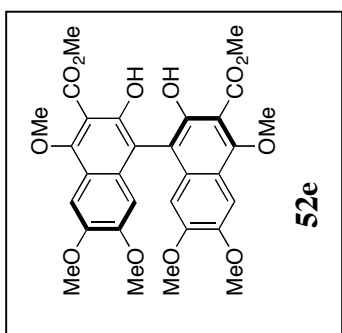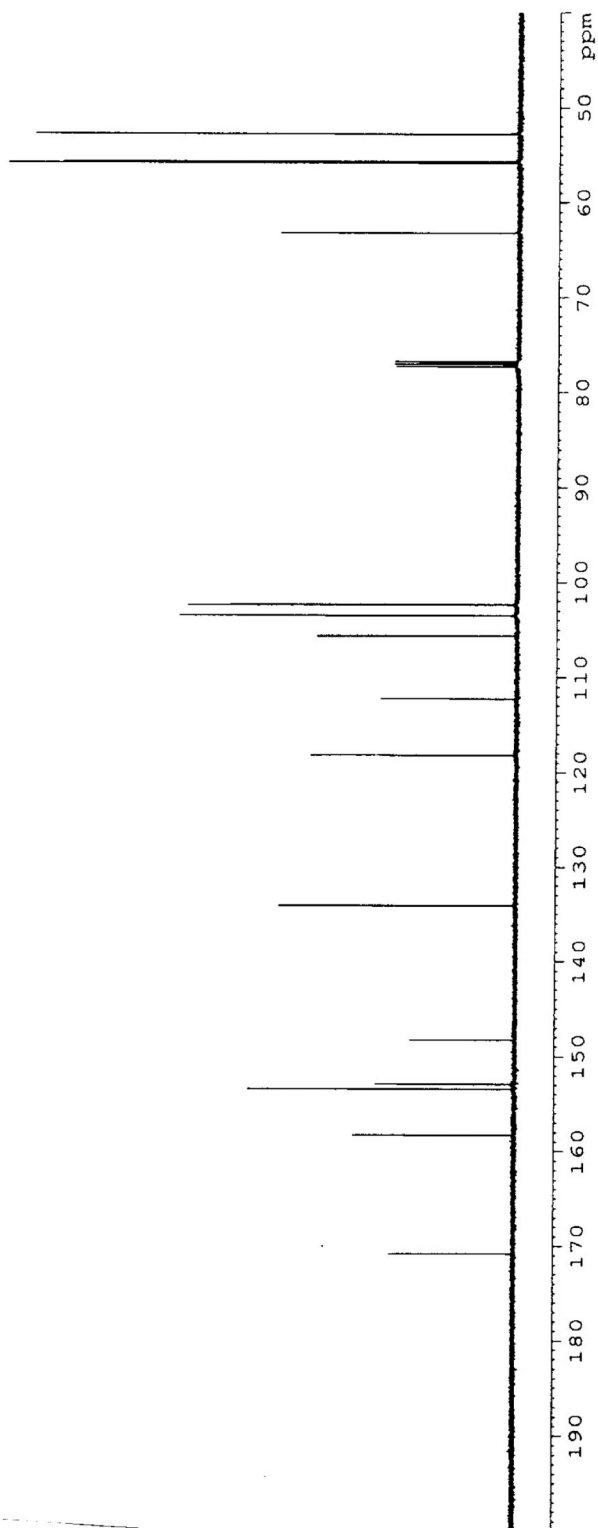

**Table 1.** 125 MHz  $^{13}\text{C}$  NMR Spectrum of Compound **52e** in  $\text{CDCl}_3$

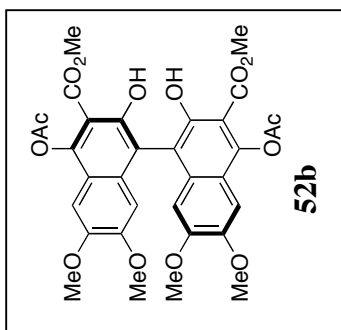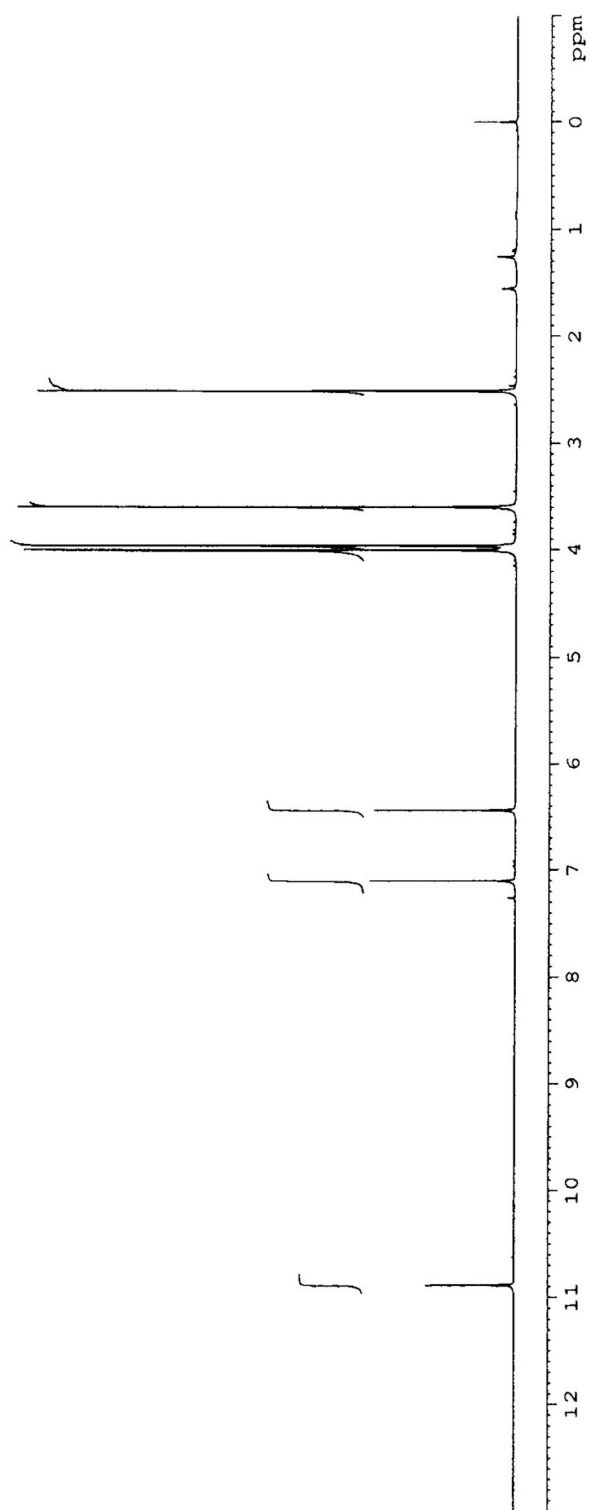

**Table 1.** 500 MHz <sup>1</sup>H NMR Spectrum of Compound **52b** in CDCl<sub>3</sub>

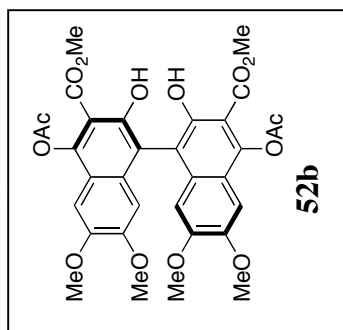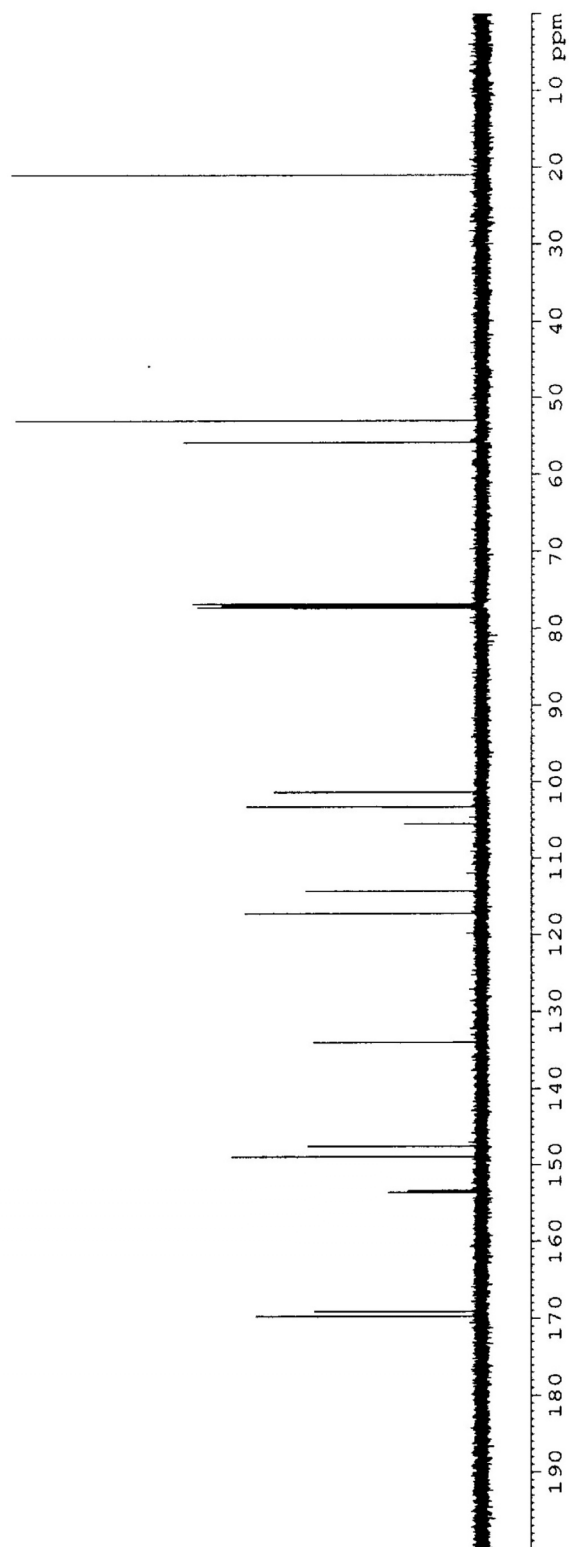

**Table 1.** 125 MHz  $^{13}\text{C}$  NMR Spectrum of Compound **52b** in  $\text{CDCl}_3$

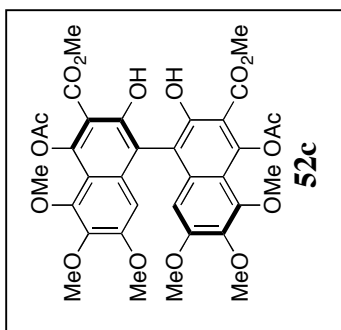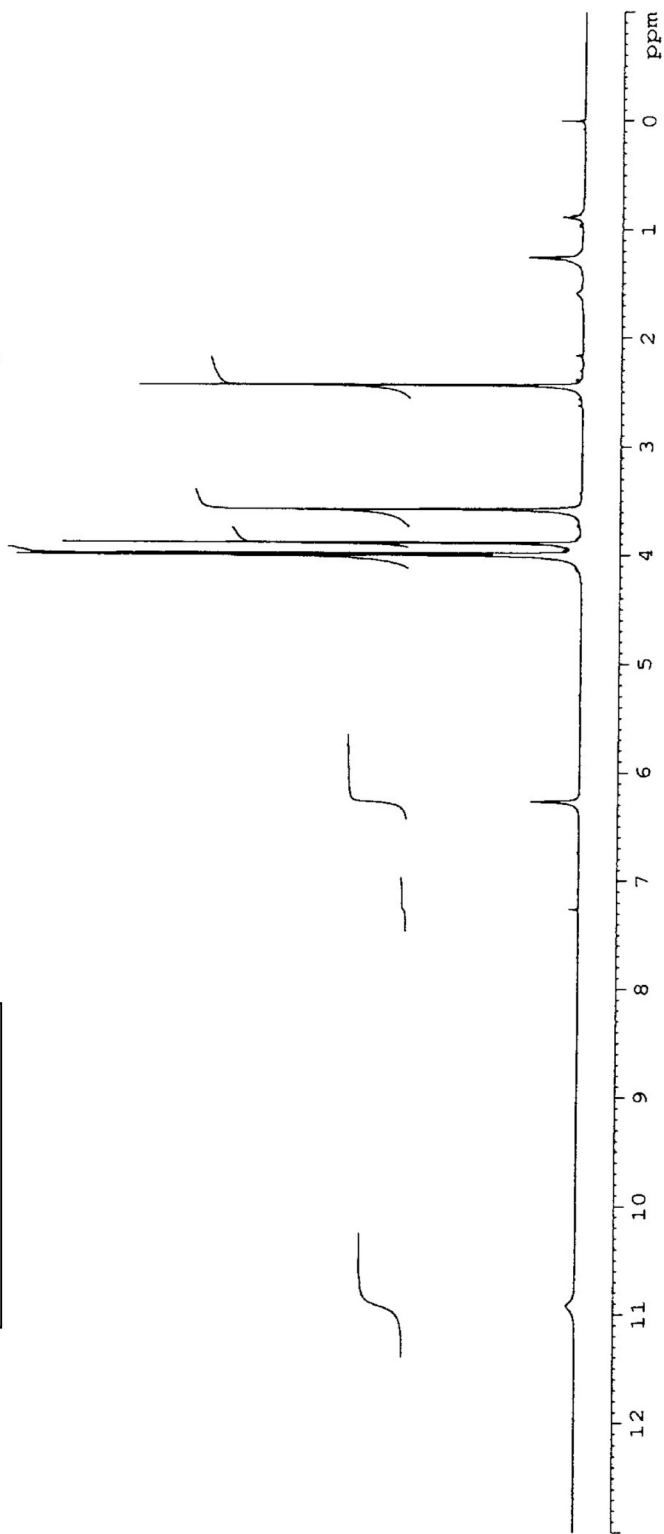

**Table 1.** 500 MHz <sup>1</sup>H NMR Spectrum of Compound **52c** in CDCl<sub>3</sub>

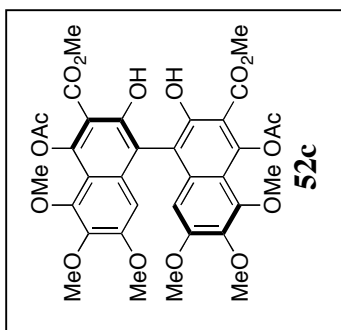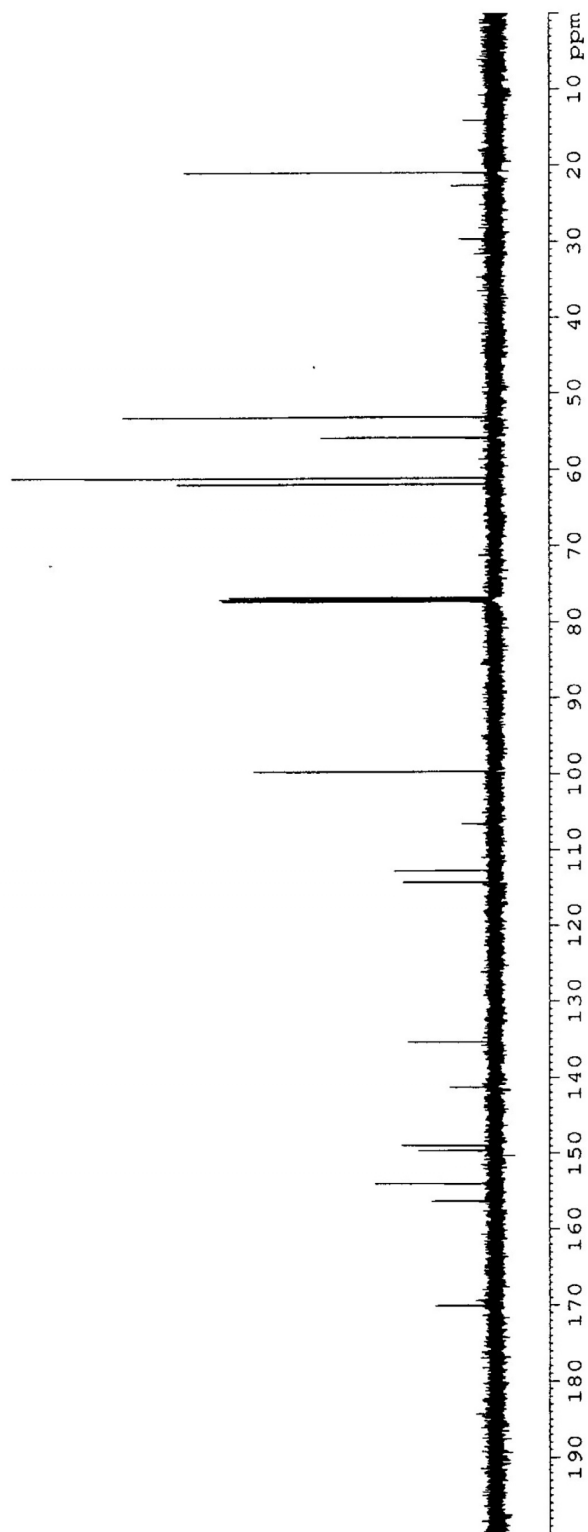

**Table 1.** 125 MHz  $^{13}\text{C}$  NMR Spectrum of Compound **52c** in  $\text{CDCl}_3$

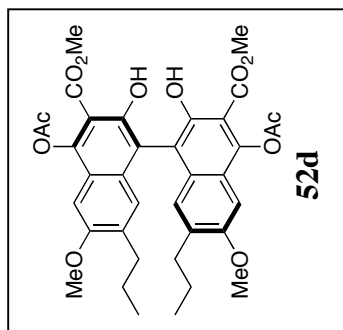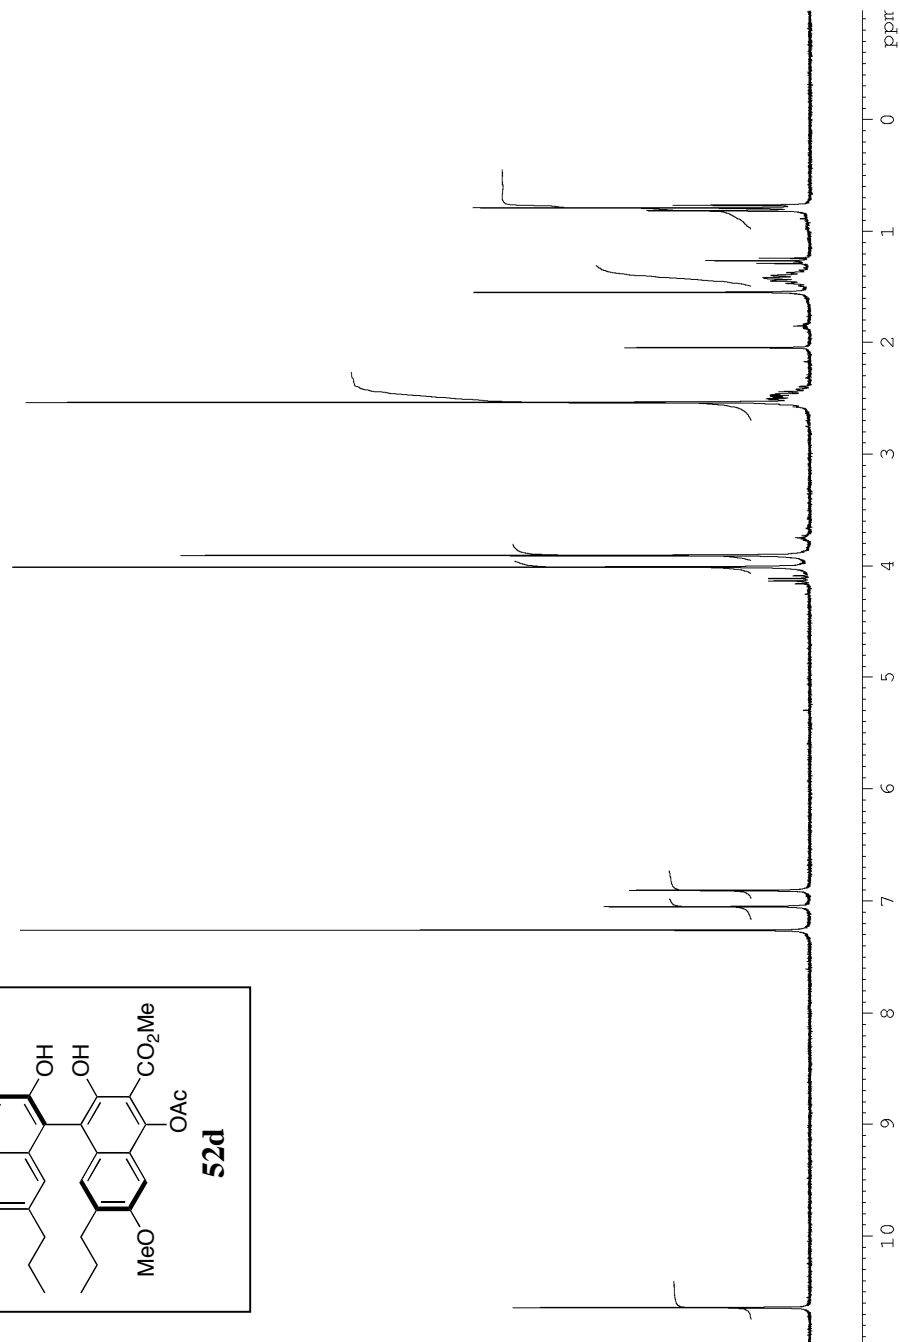

**Table 1.** 300 MHz <sup>1</sup>H NMR Spectrum of Compound **52d** in CDCl<sub>3</sub>



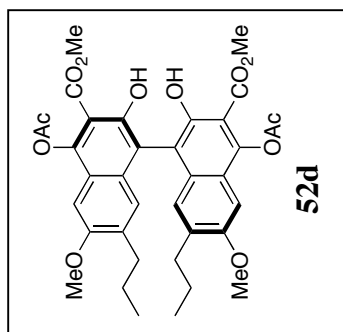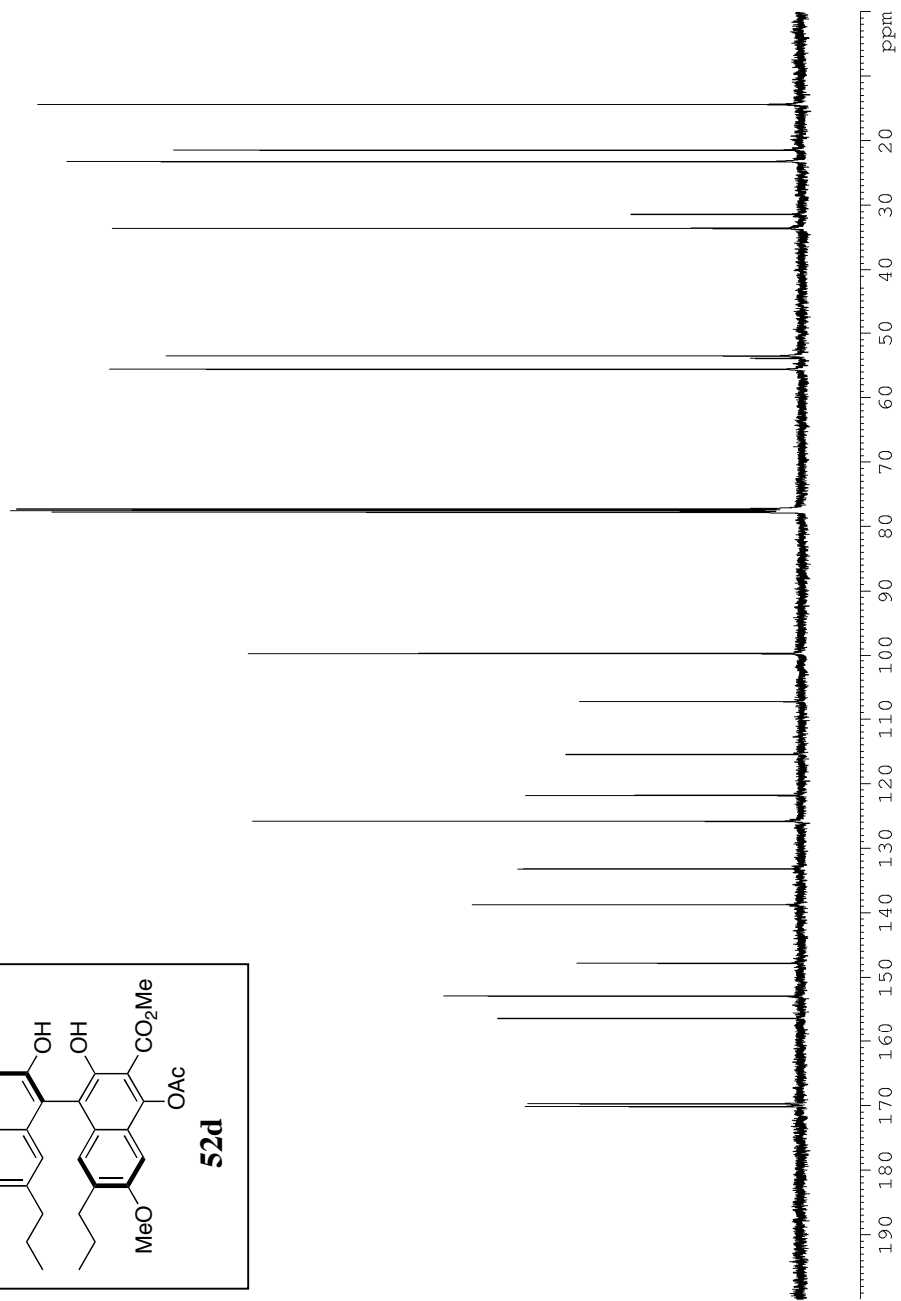

**Table 1.** 125 MHz  $^{13}\text{C}$  NMR Spectrum of Compound **52d** in  $\text{CDCl}_3$

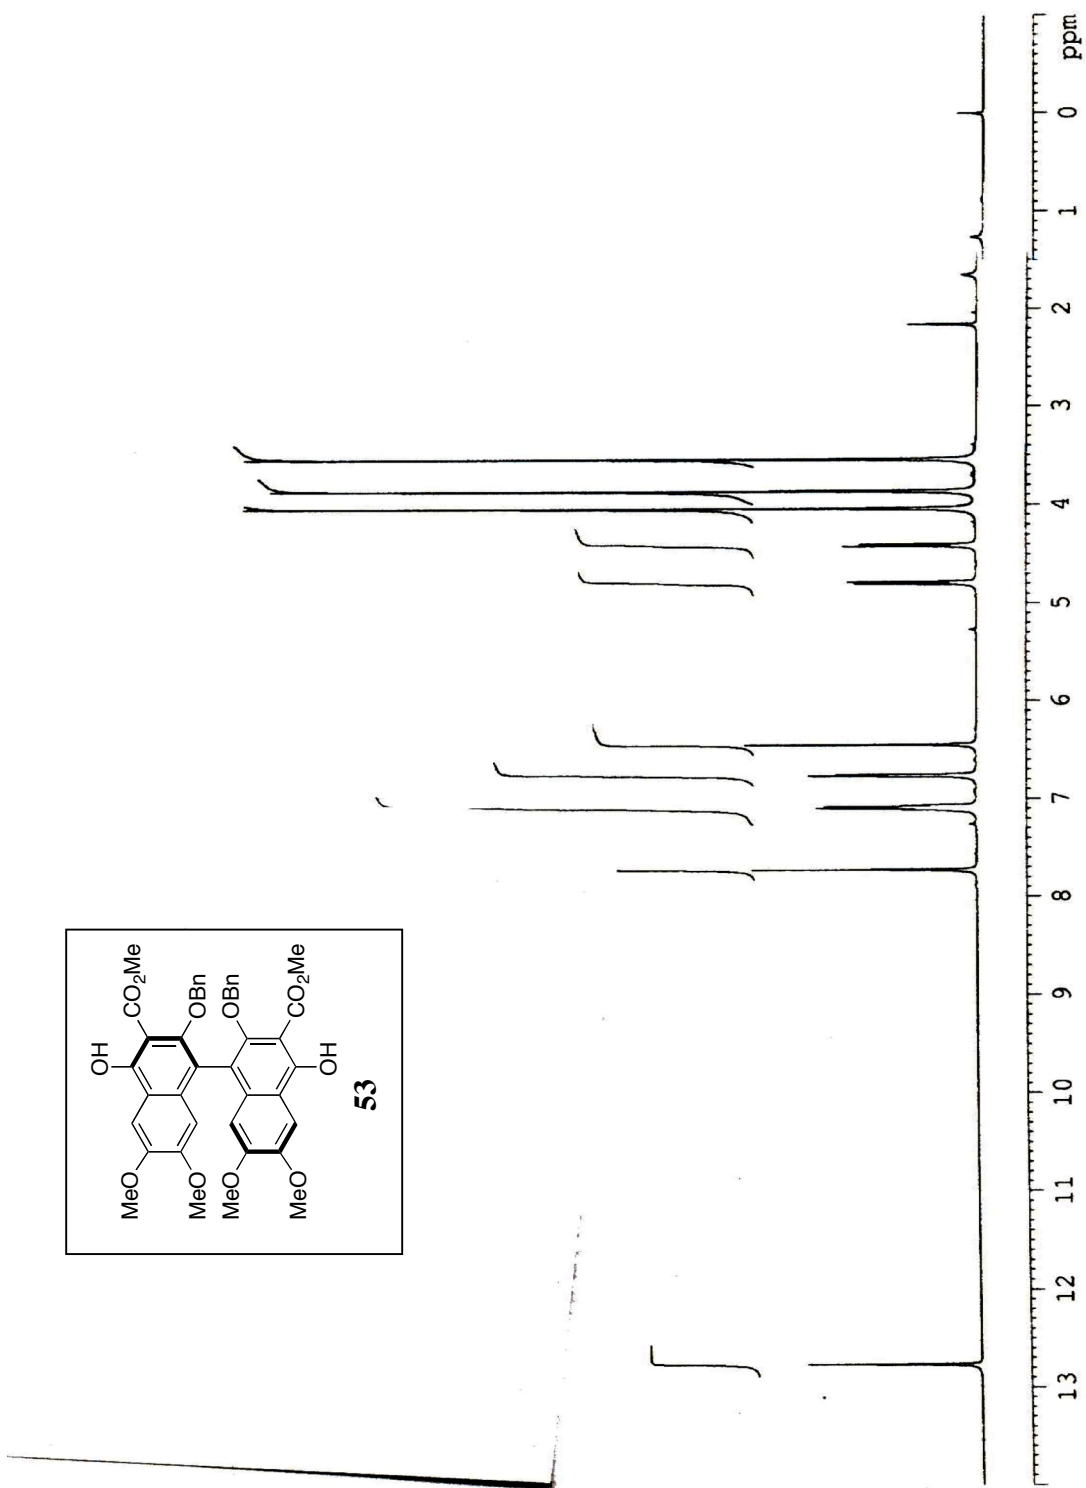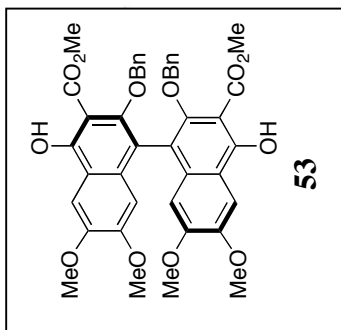

**Scheme 10.** 500 MHz <sup>1</sup>H NMR Spectrum of Compound **53** in CDCl<sub>3</sub>

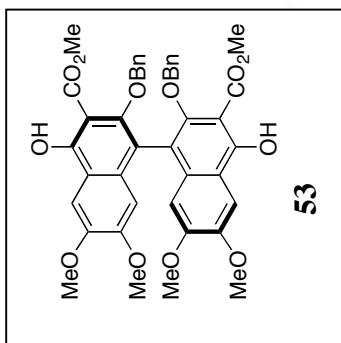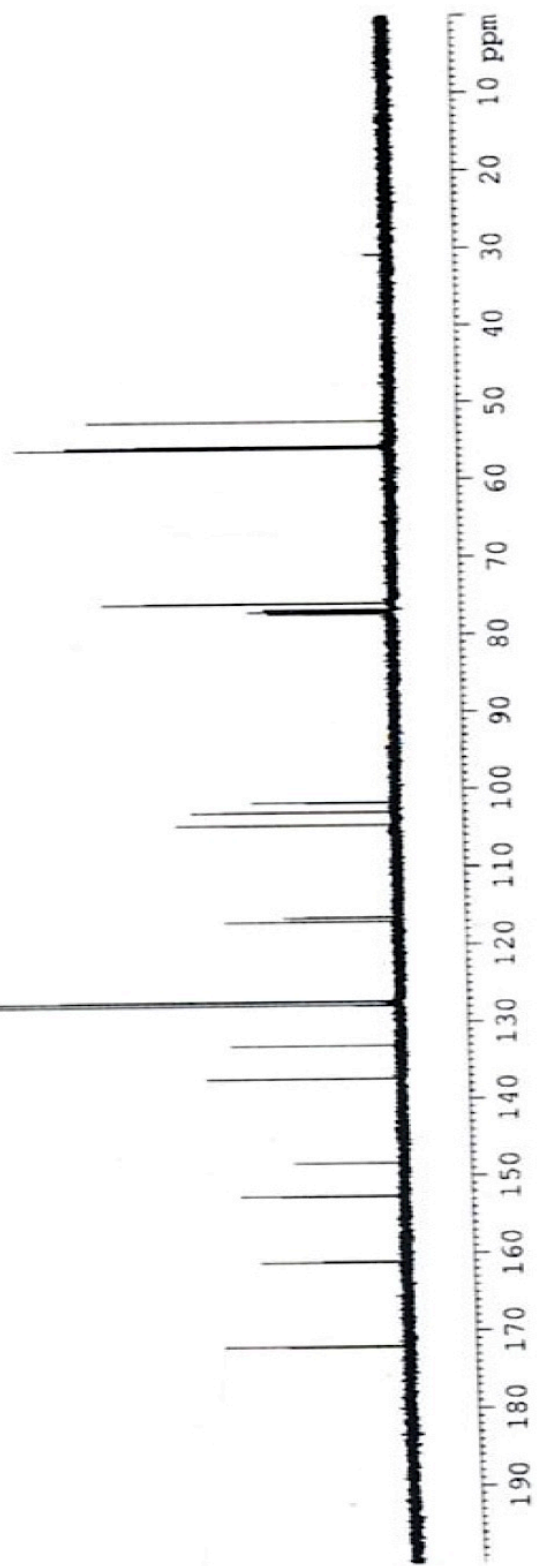

**Scheme 10.** 125 MHz  $^{13}\text{C}$  NMR Spectrum of Compound **53** in  $\text{CDCl}_3$

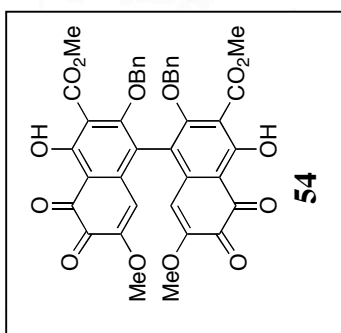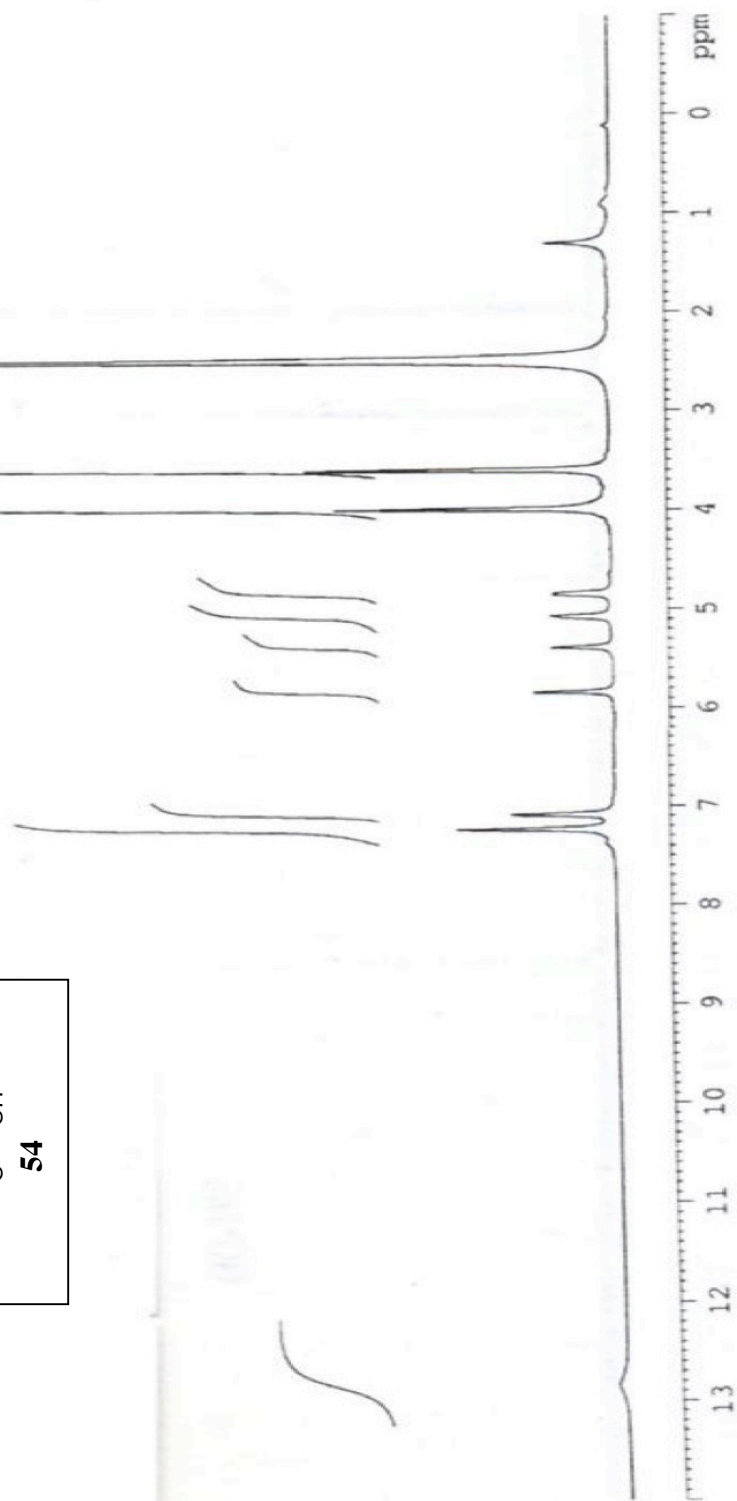

**Scheme 10.** 500 MHz <sup>1</sup>H NMR Spectrum of Compound **54** in CD<sub>2</sub>Cl<sub>2</sub>/d<sub>6</sub>-DMSO

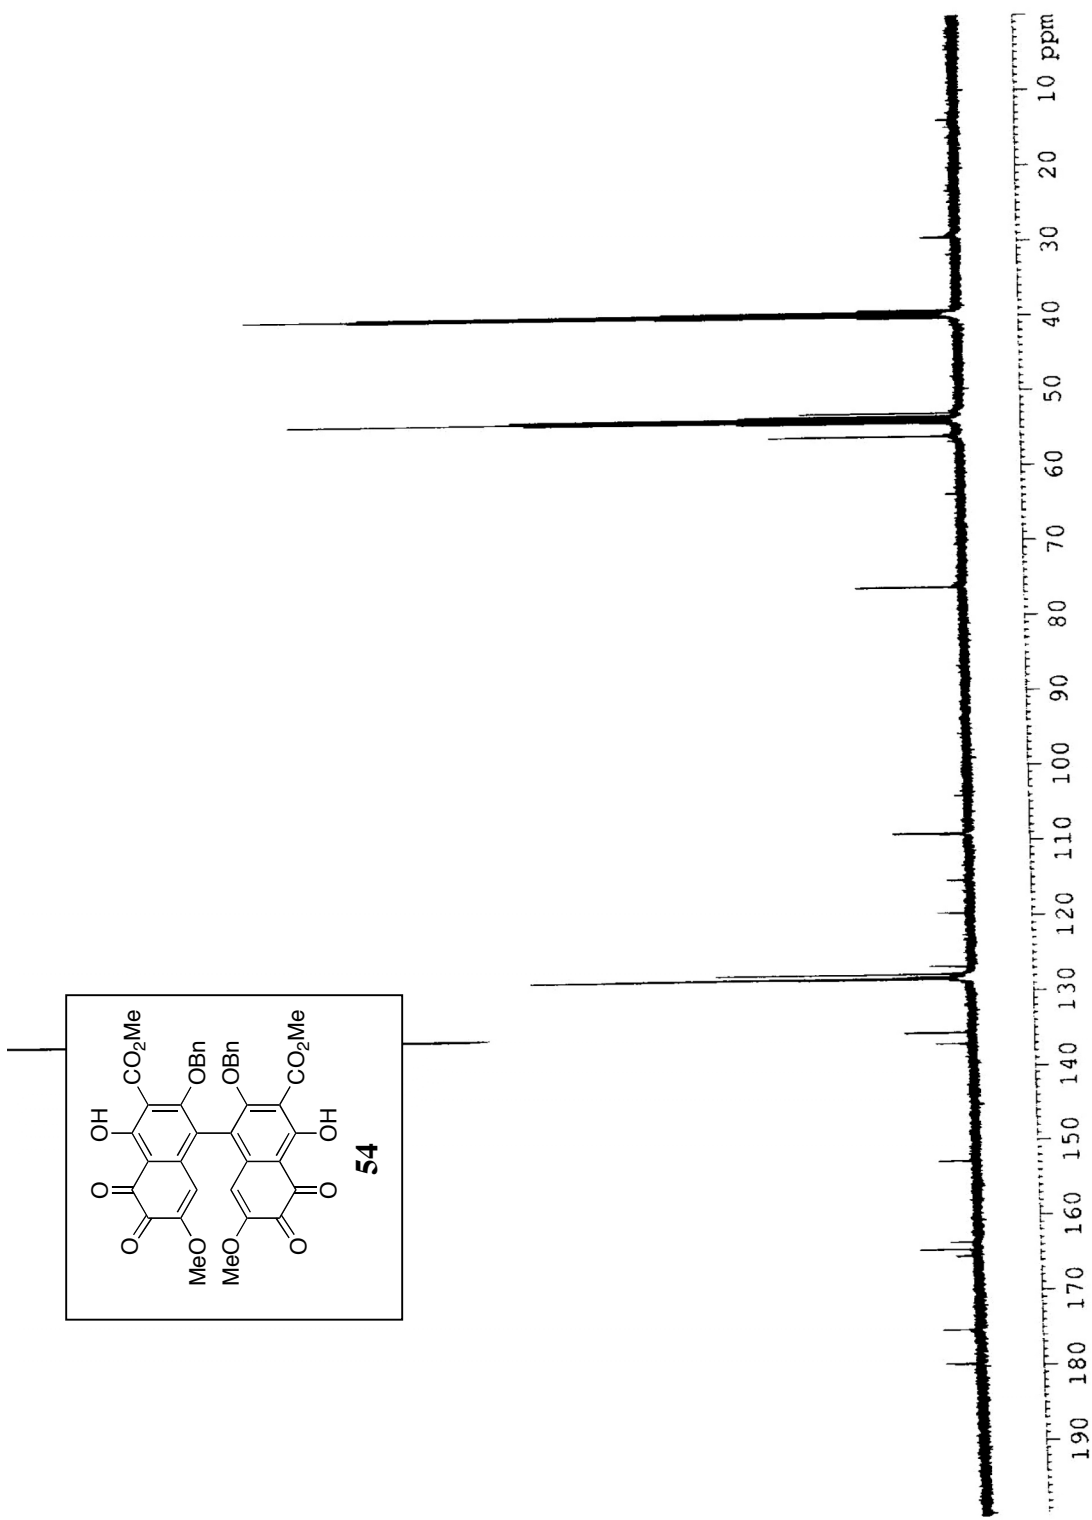

**Scheme 10.** 125 MHz <sup>13</sup>C NMR Spectrum of Compound **54** in CD<sub>2</sub>Cl<sub>2</sub>/d<sub>6</sub>-DMSO

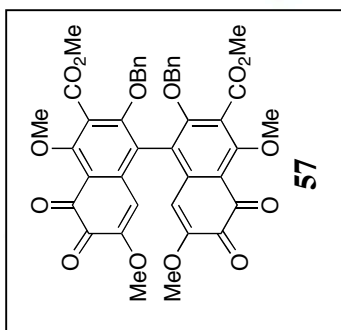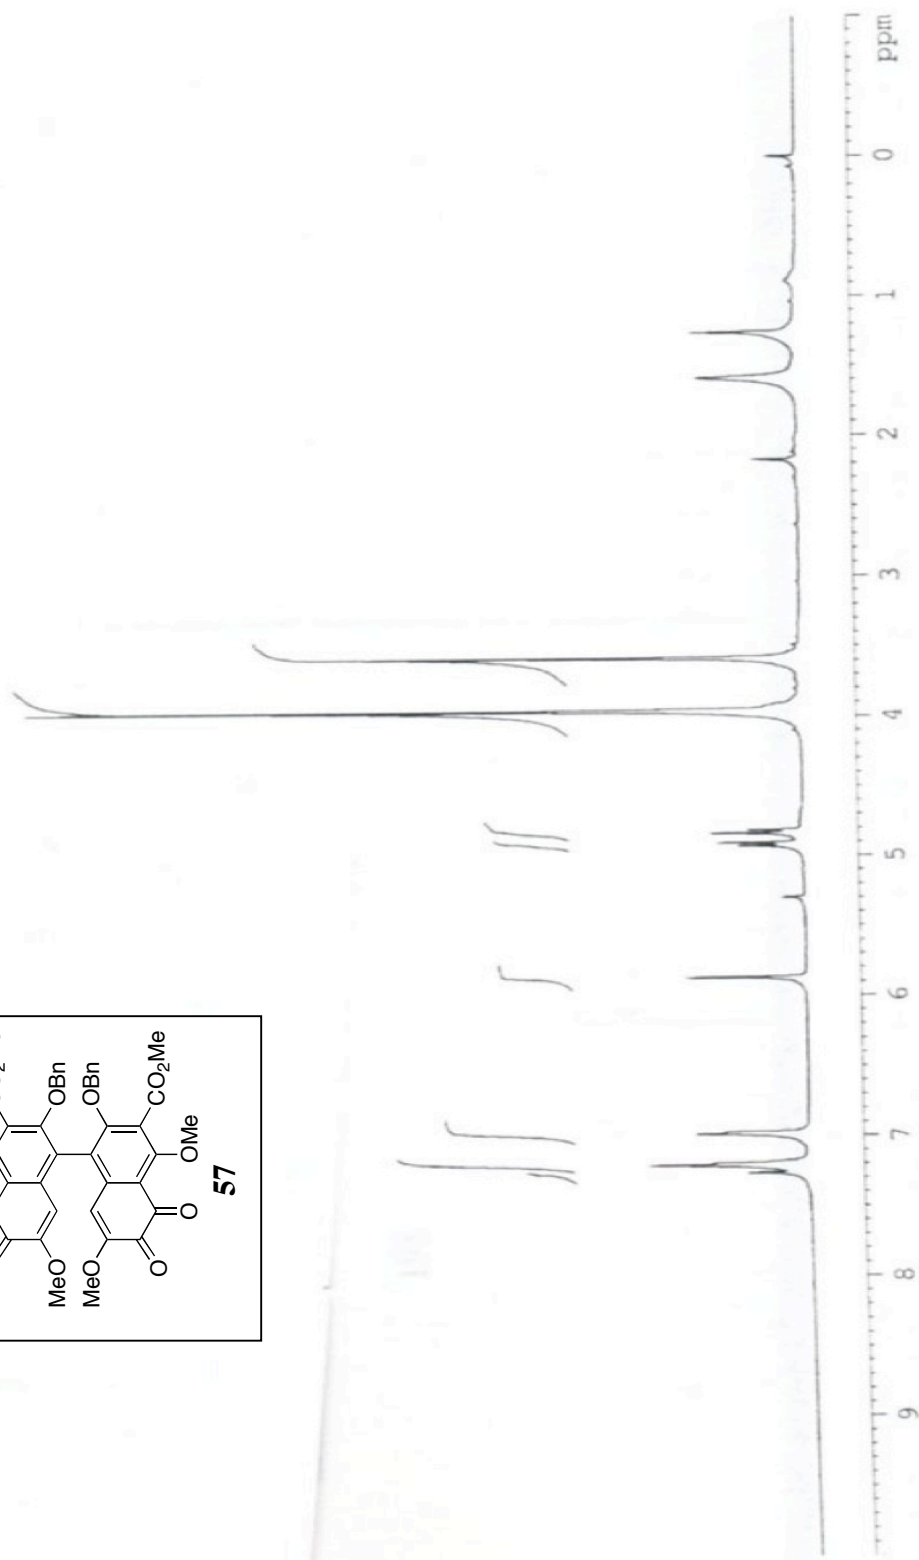

**Equation 3.** 500 MHz  $^1\text{H}$  NMR Spectrum of Compound **57** in  $\text{CDCl}_3$

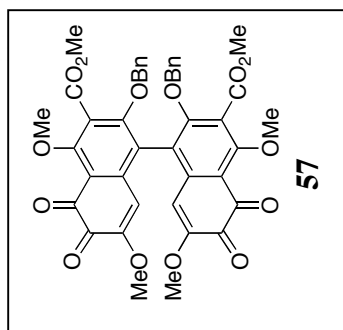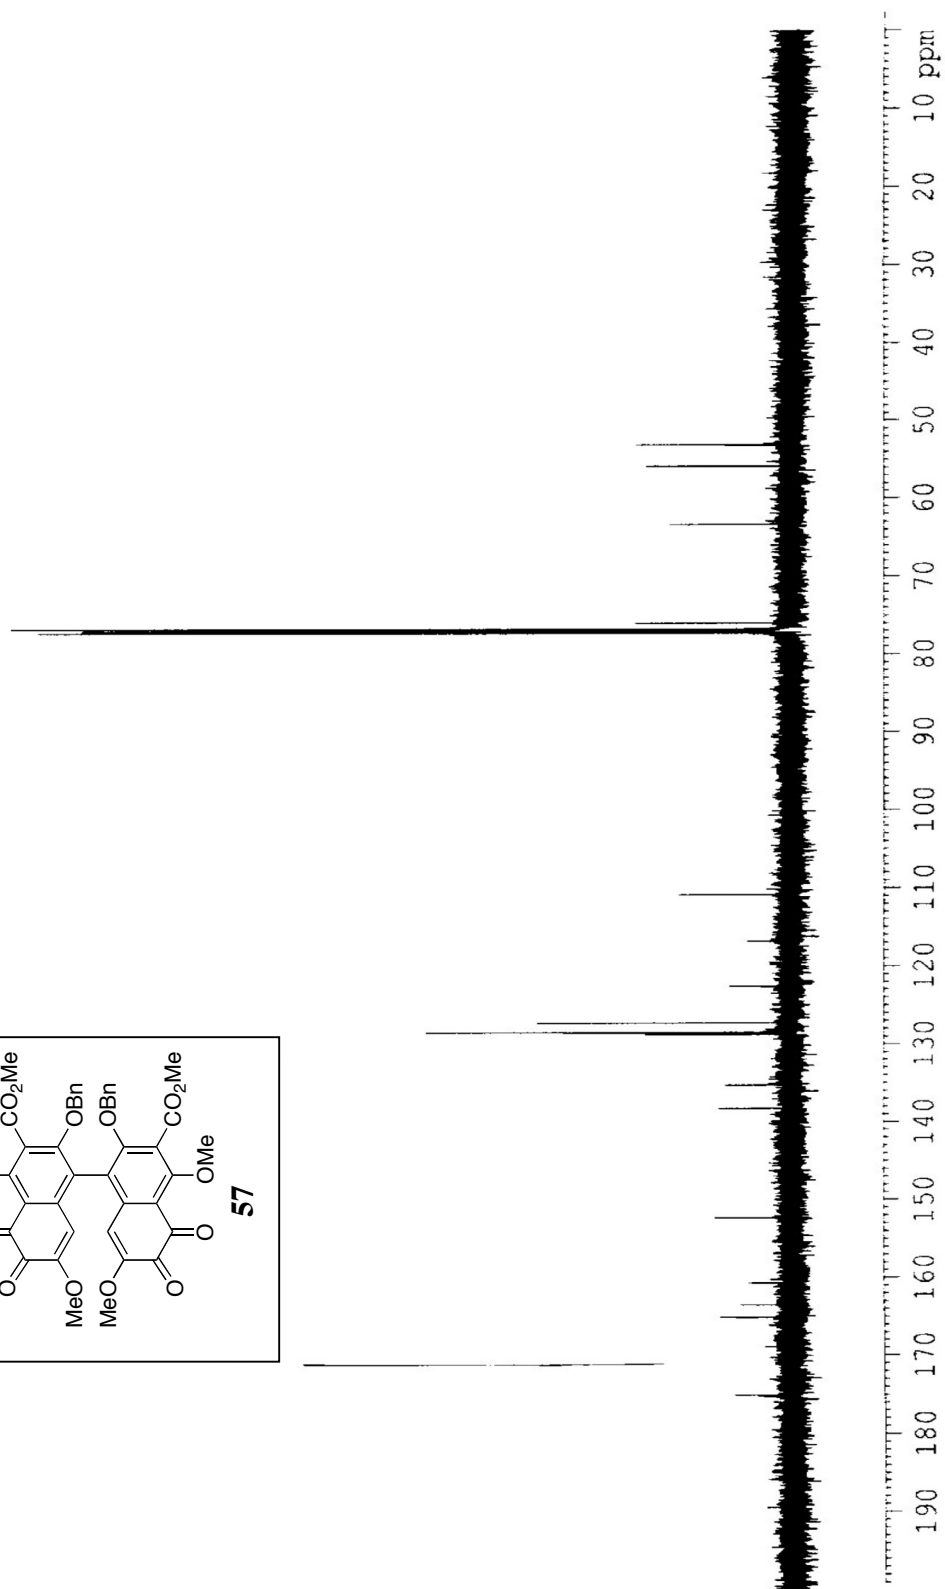

**Equation 3.** 125 MHz  $^{13}\text{C}$  NMR Spectrum of Compound **57** in  $\text{CDCl}_3$

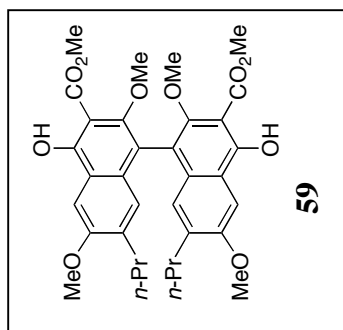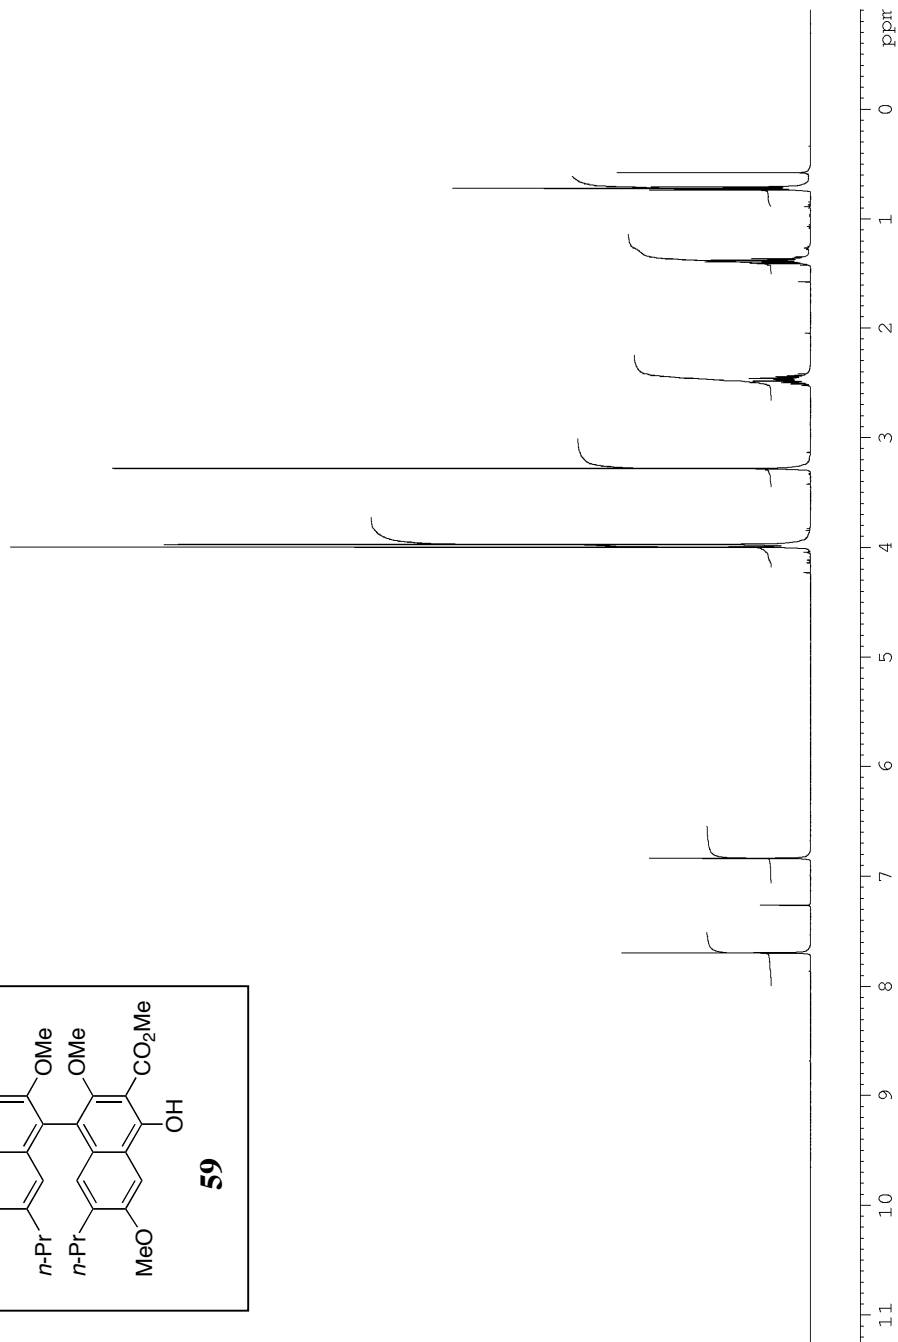

**Scheme 11.** 500 MHz <sup>1</sup>H NMR Spectrum of Compound **59** in CDCl<sub>3</sub>



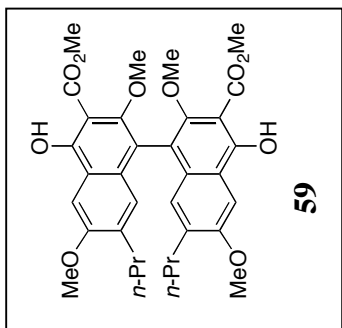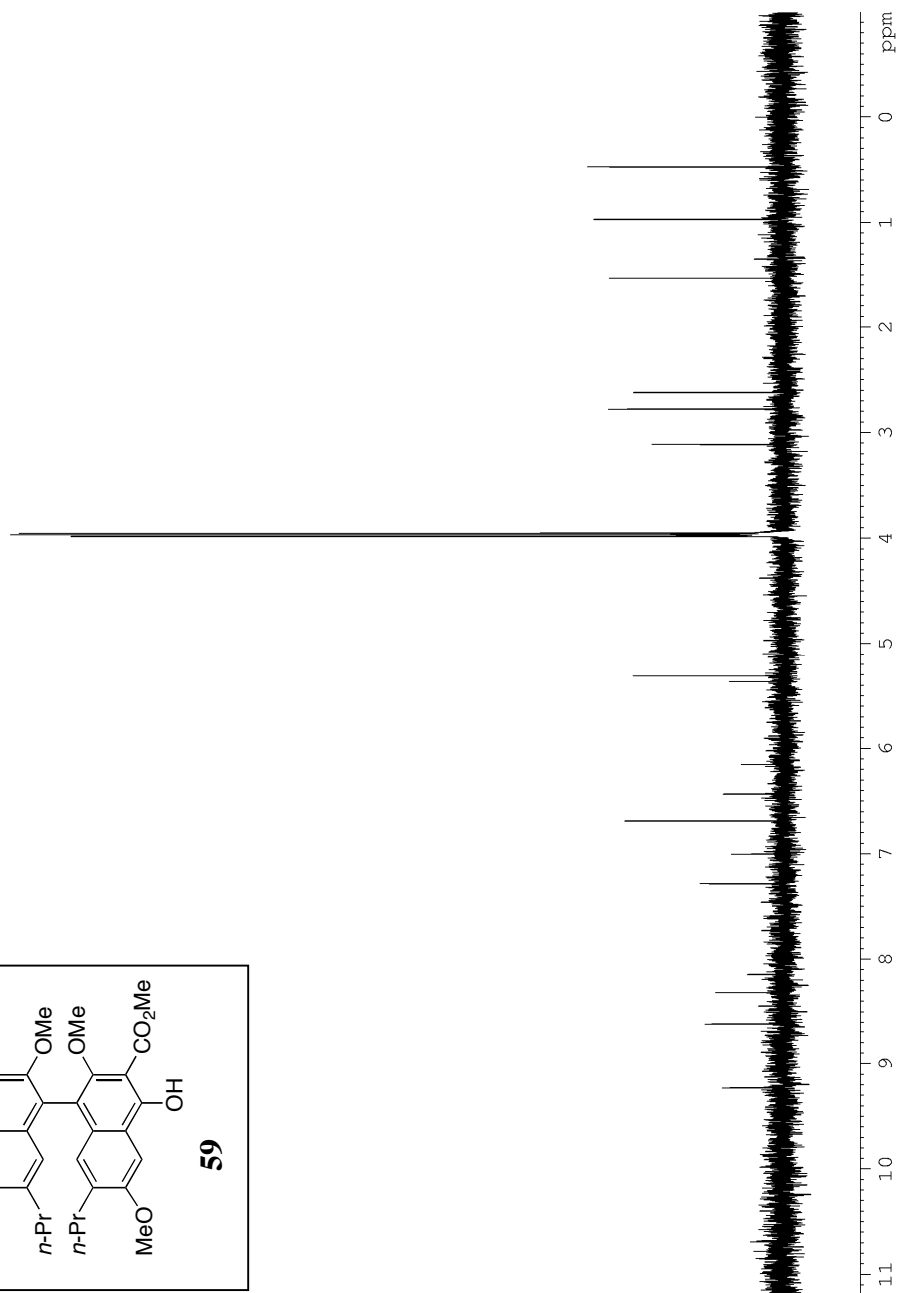

**Scheme 11.** 125 MHz <sup>13</sup>C NMR Spectrum of Compound **59** in CDCl<sub>3</sub>

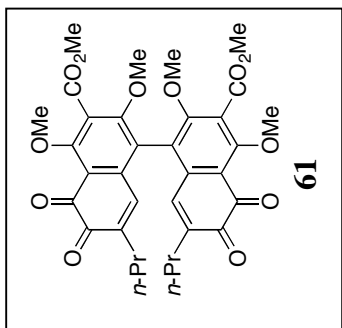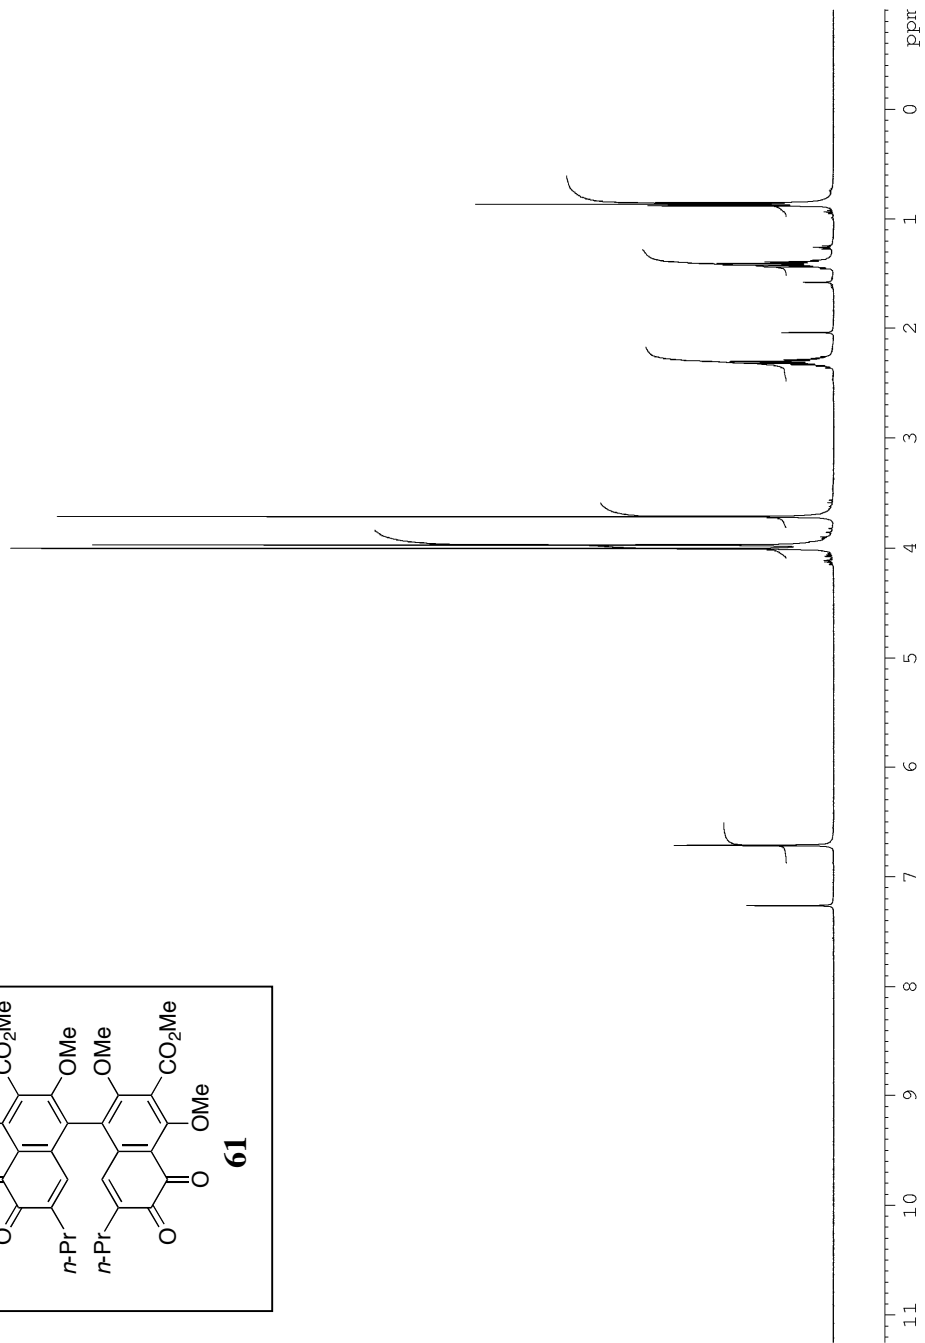

**Scheme 11.** 500 MHz  $^1\text{H}$  NMR Spectrum of Compound **61** in  $\text{CDCl}_3$

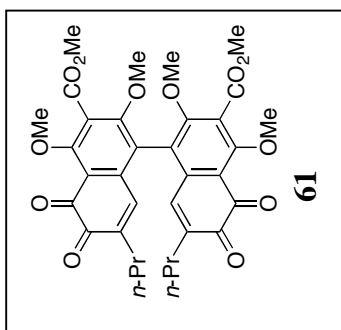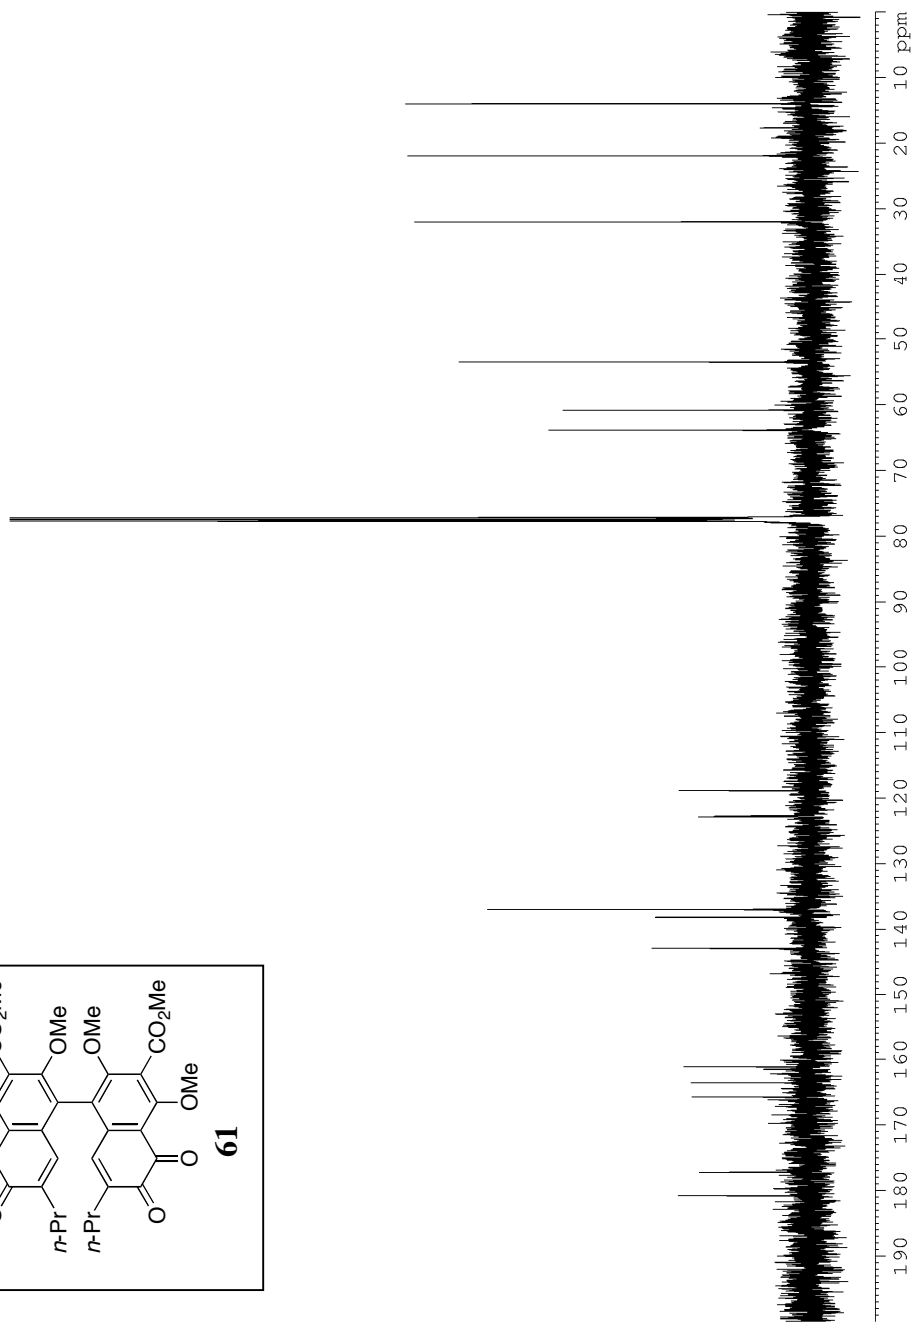

**Scheme 11.** 125 MHz  $^{13}\text{C}$  NMR Spectrum of Compound **61** in  $\text{CDCl}_3$

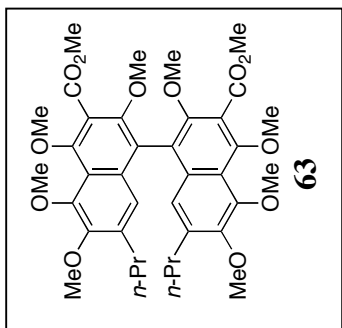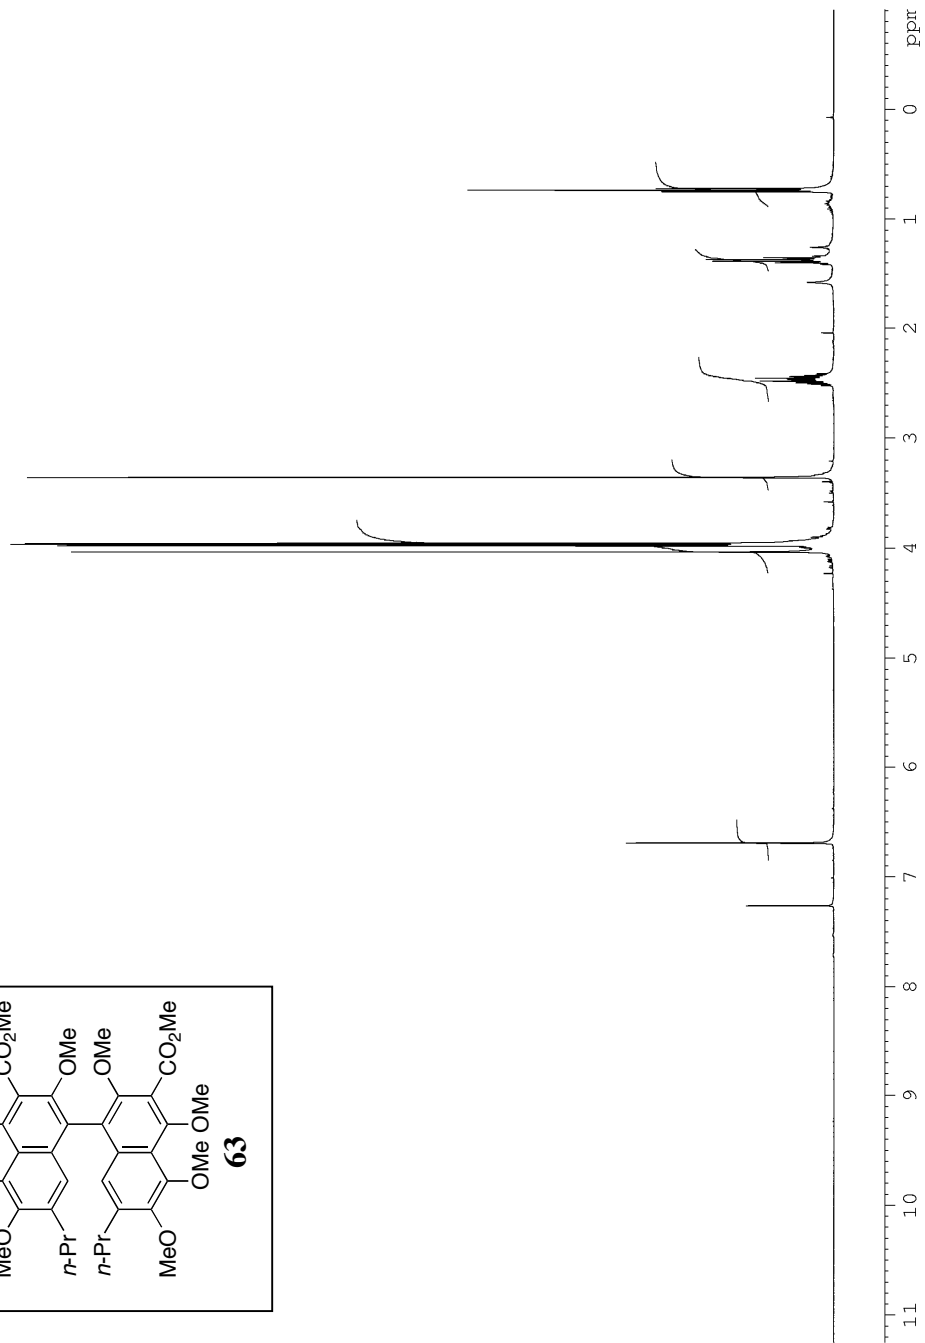

**Scheme 12.** 500 MHz <sup>1</sup>H NMR Spectrum of Compound **63** in CDCl<sub>3</sub>

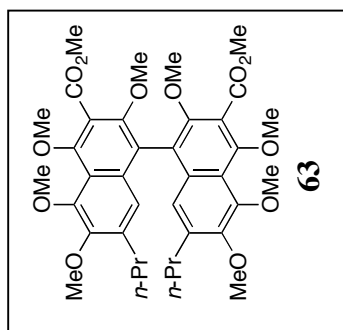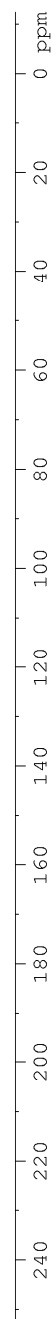

**Scheme 12.** 125 MHz <sup>13</sup>C NMR Spectrum of Compound **63** in CDCl<sub>3</sub>

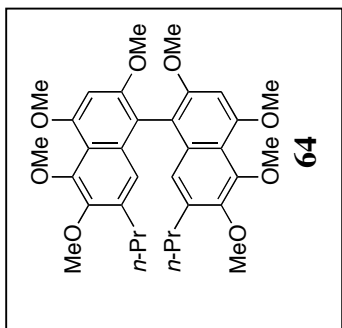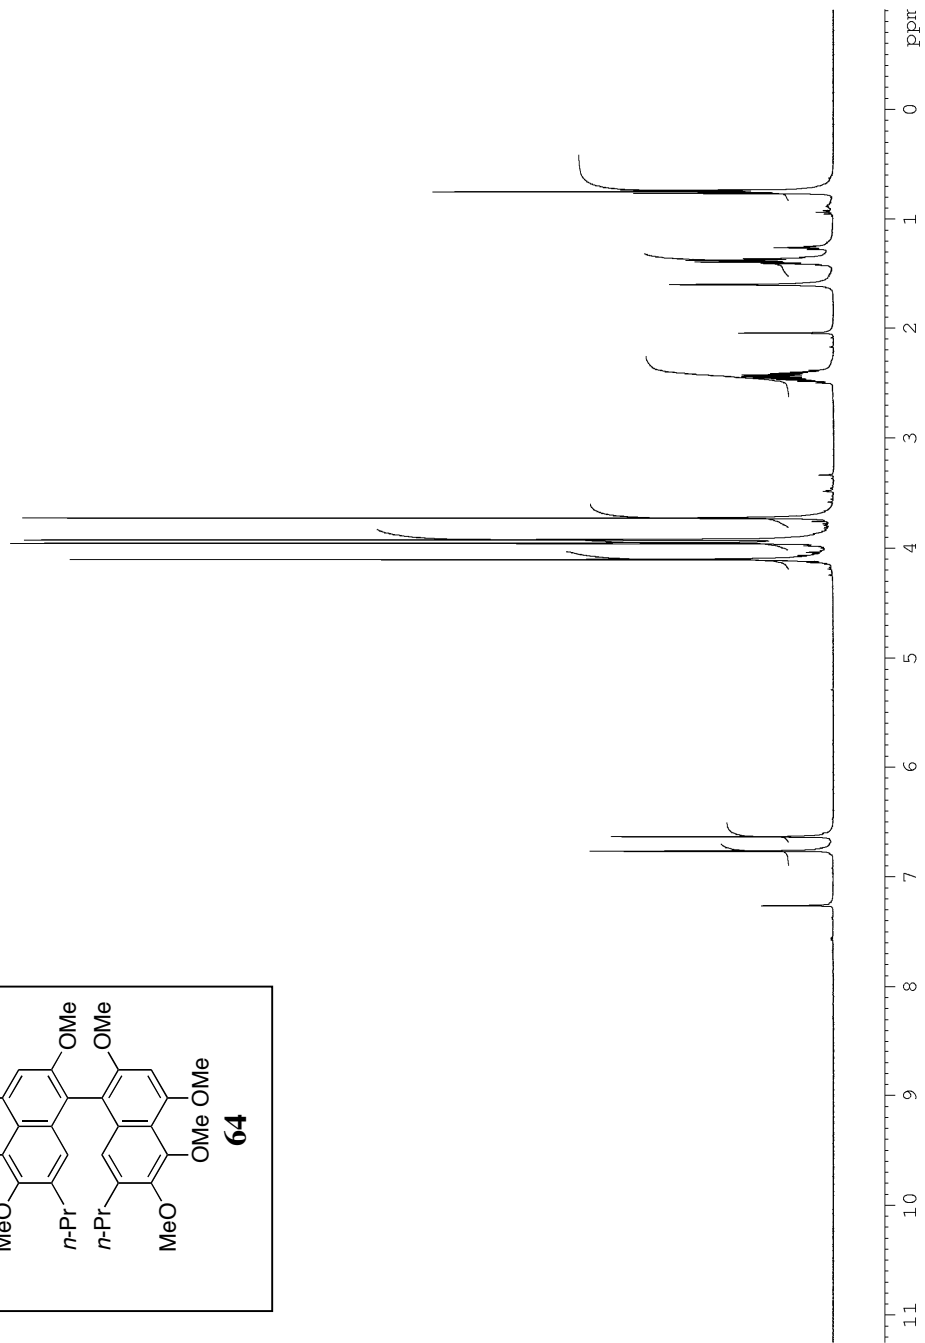

**Scheme 12.** 500 MHz <sup>1</sup>H NMR Spectrum of Compound **64** in CDCl<sub>3</sub>

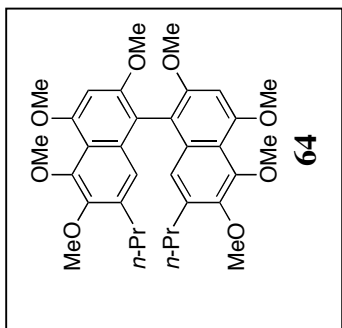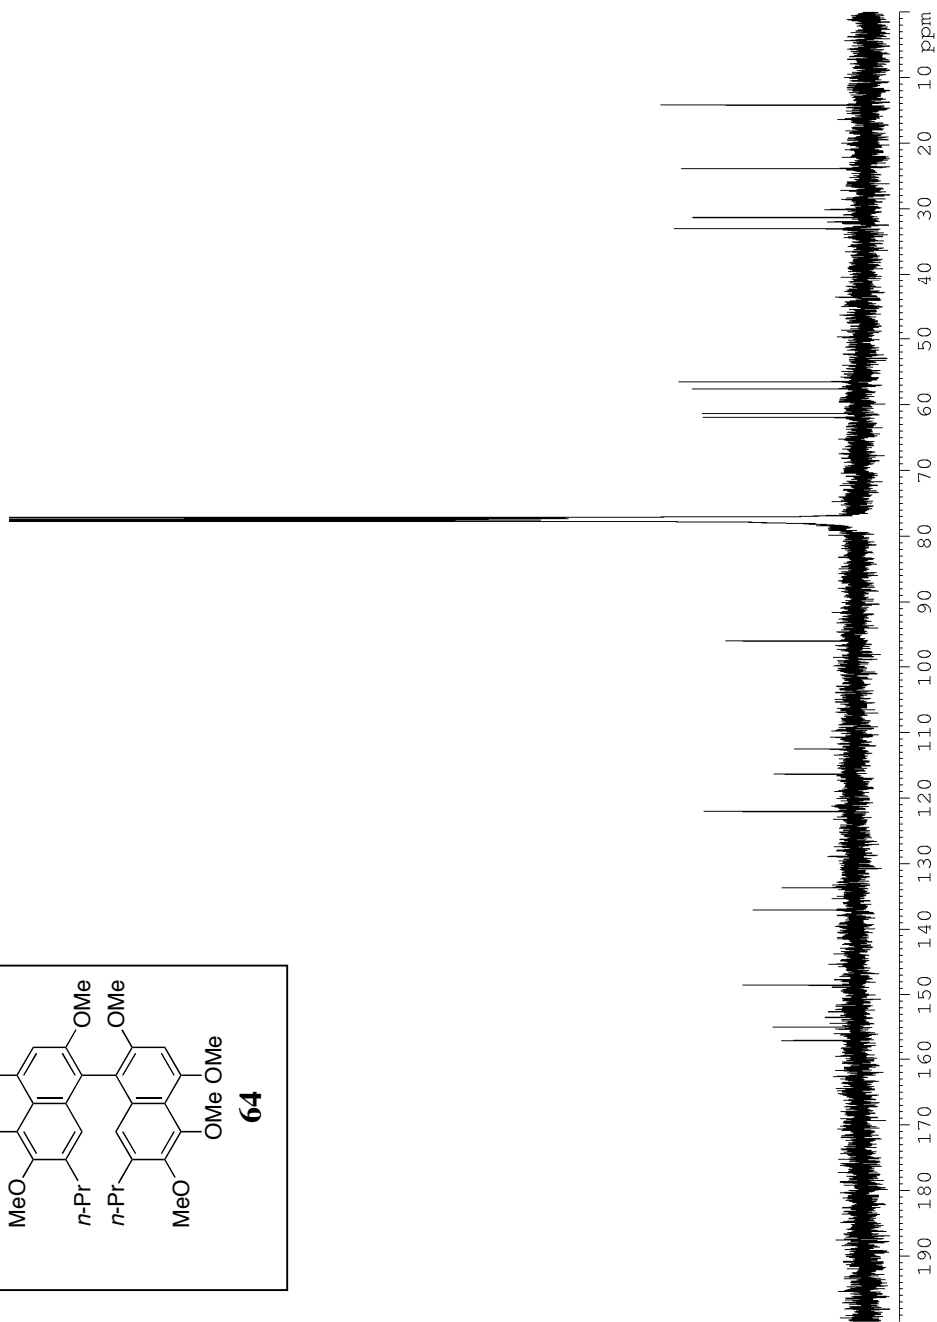

**Scheme 12.** 125 MHz  $^{13}\text{C}$  NMR Spectrum of Compound **64** in  $\text{CDCl}_3$

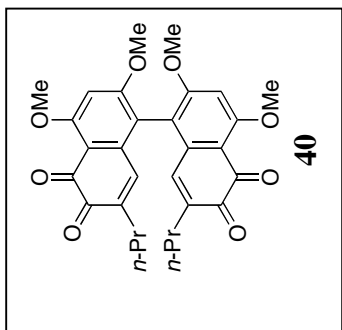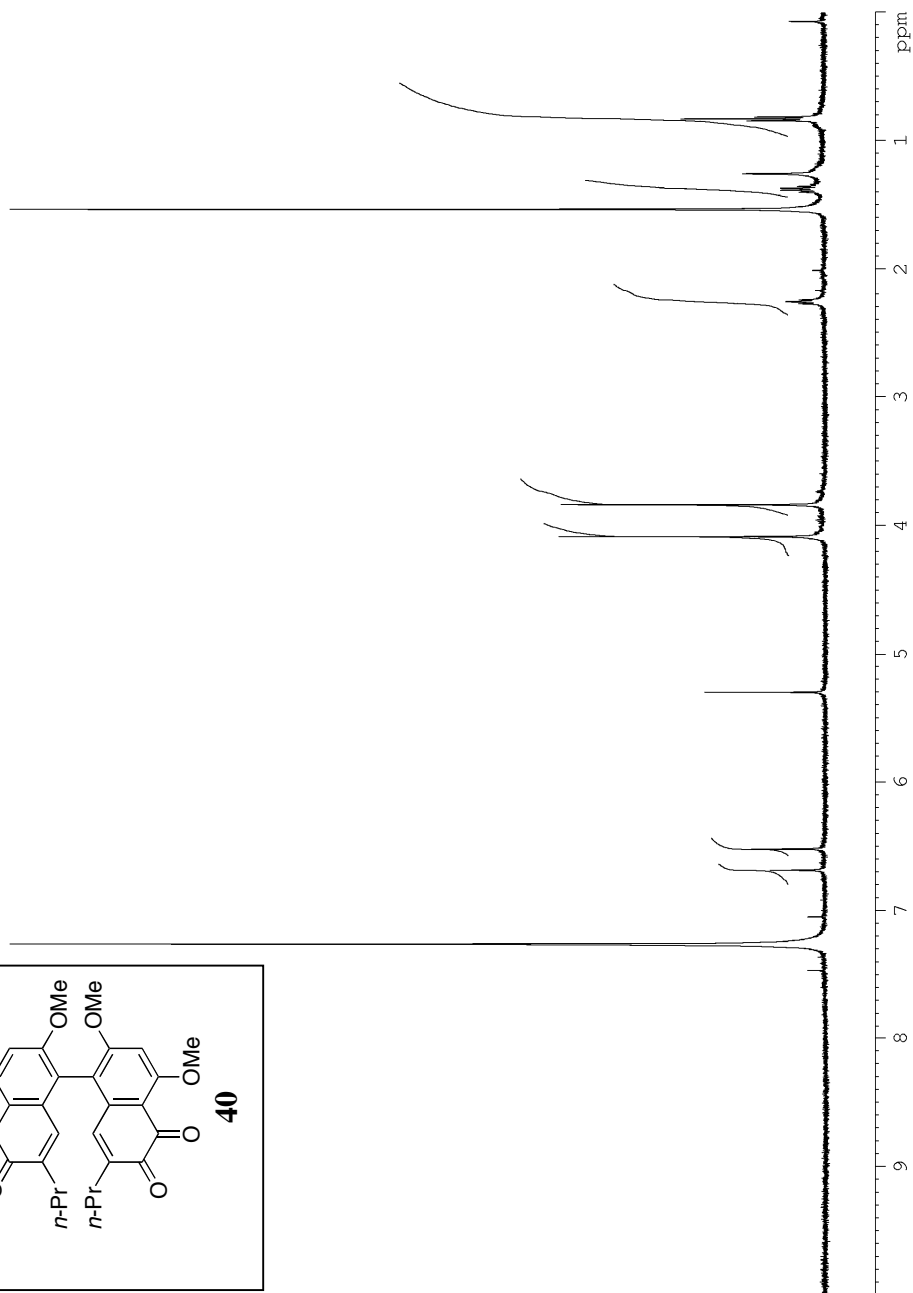

**Scheme 12.** 500 MHz <sup>1</sup>H NMR Spectrum of Compound **40** in CDCl<sub>3</sub>



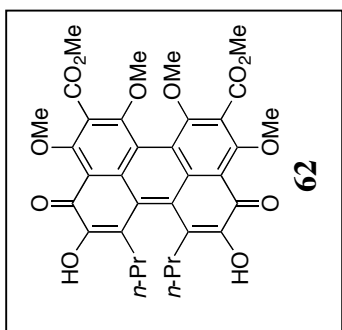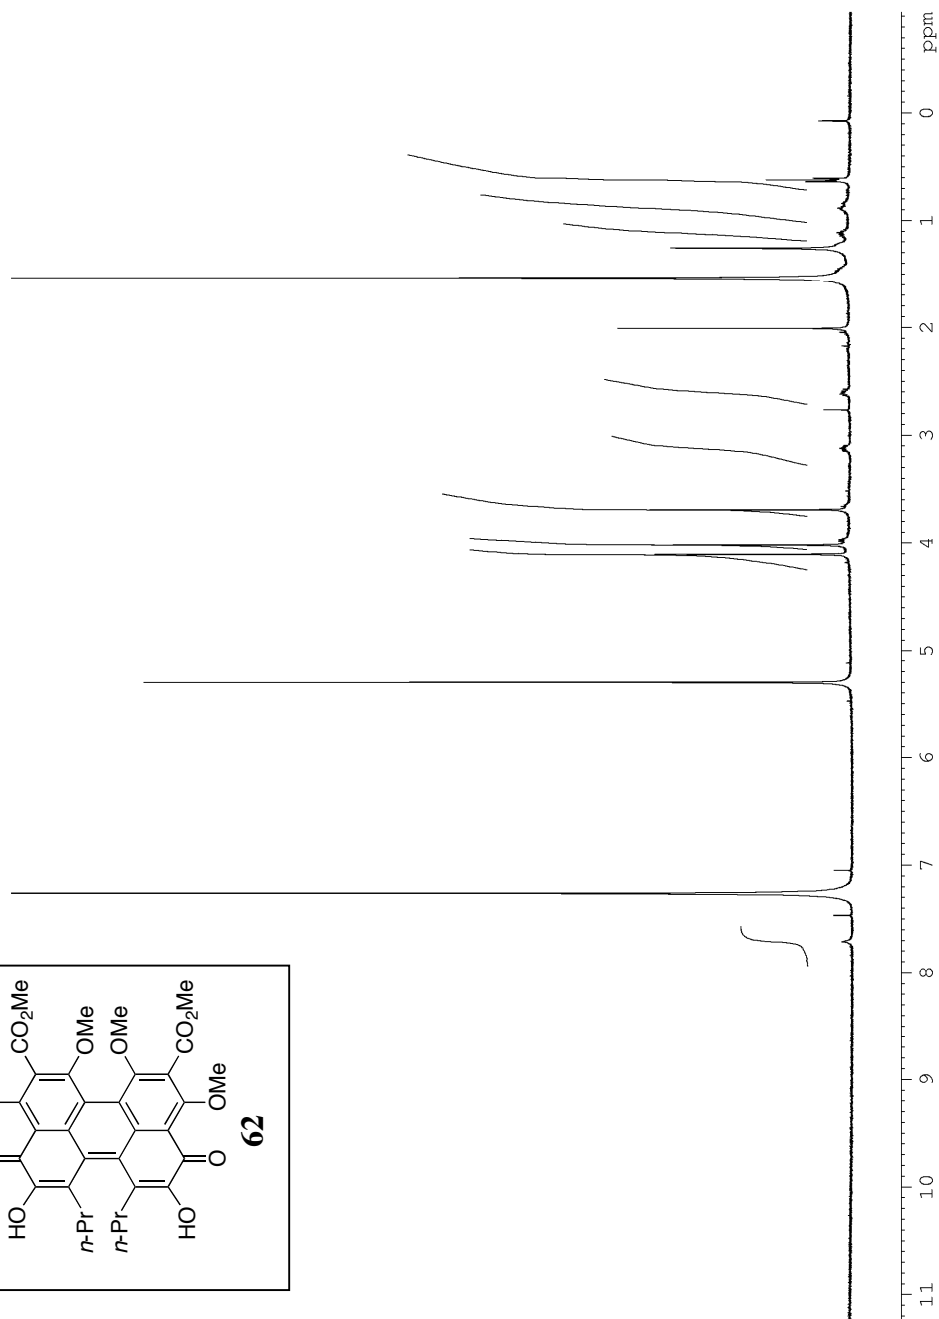

**Scheme 13.** 500 MHz  $^1\text{H}$  NMR Spectrum of Compound **62** in  $\text{CDCl}_3$

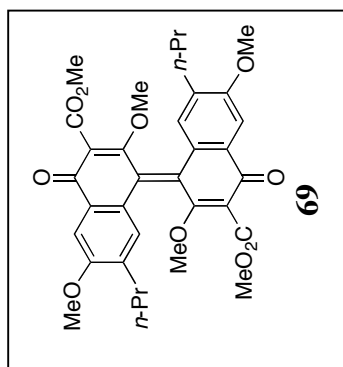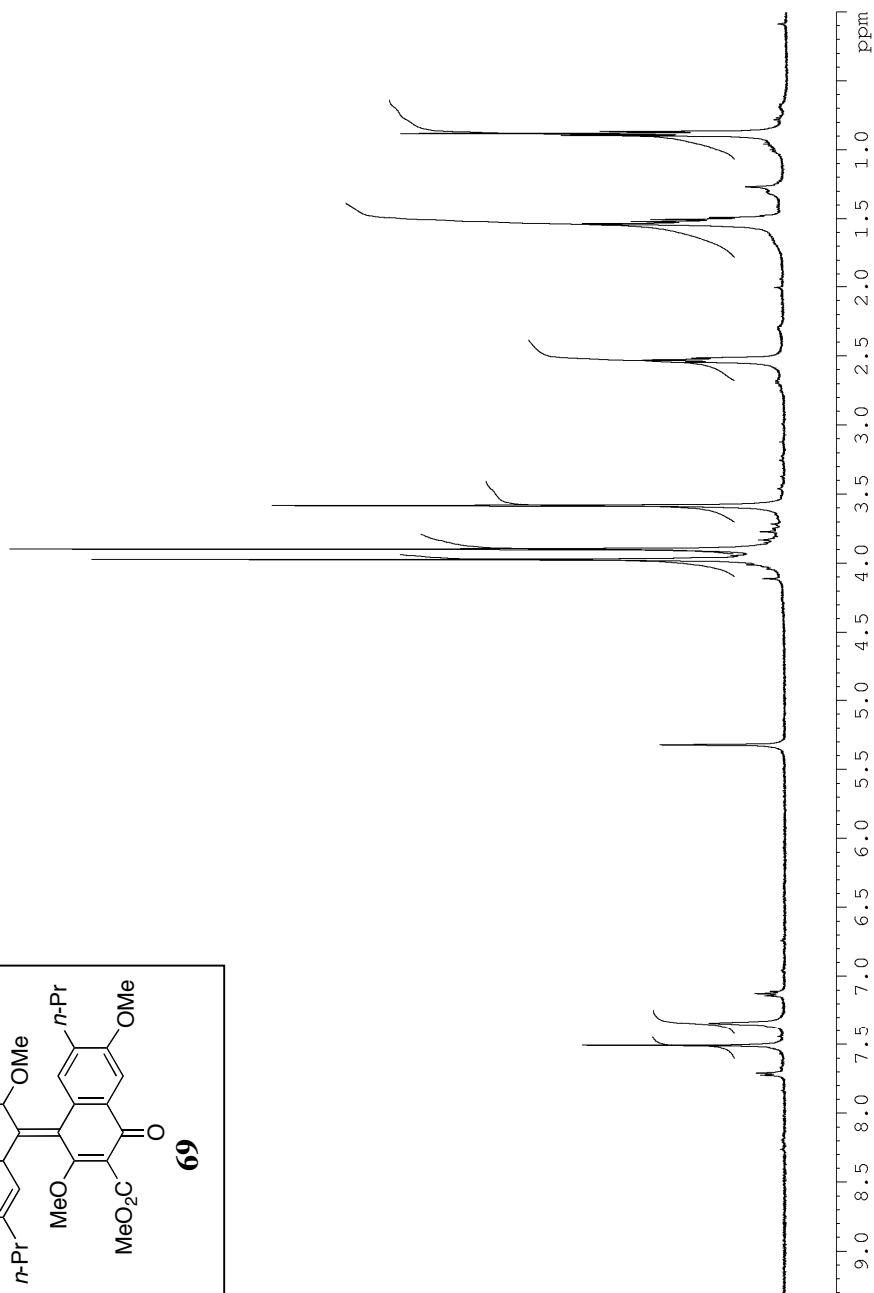

**Scheme 14.** 500 MHz <sup>1</sup>H NMR Spectrum of Compound **69** in CDCl<sub>3</sub>

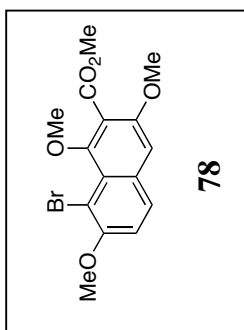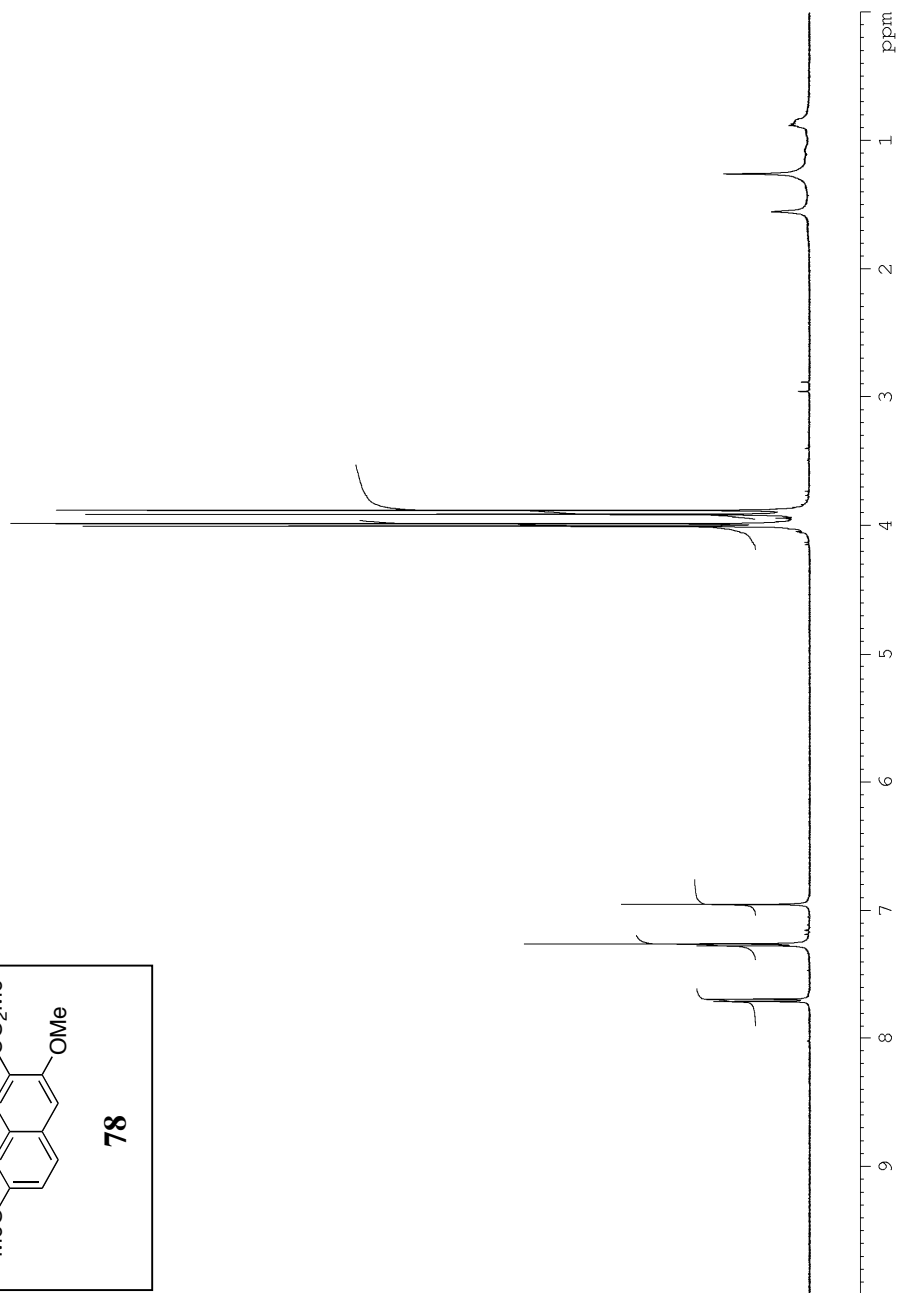

**Scheme 16.** 360 MHz <sup>1</sup>H NMR Spectrum of Compound **78** in CDCl<sub>3</sub>

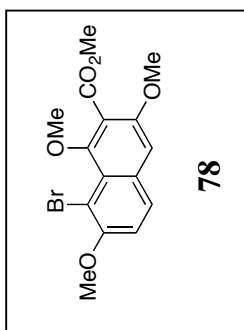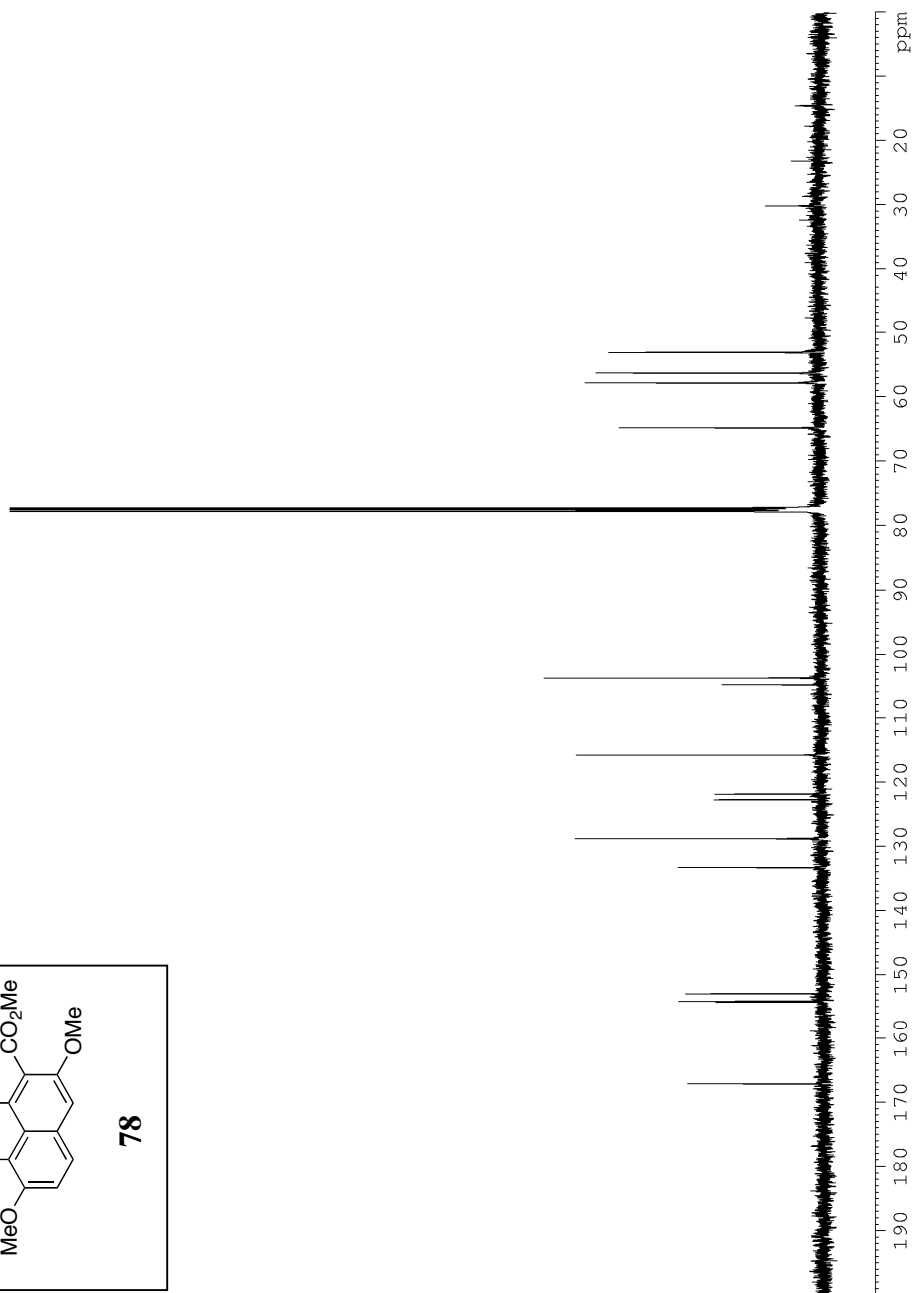

**Scheme 16.** 125 MHz <sup>13</sup>C NMR Spectrum of Compound **78** in CDCl<sub>3</sub>

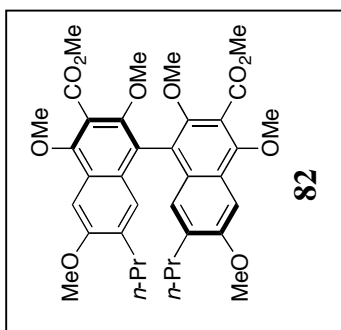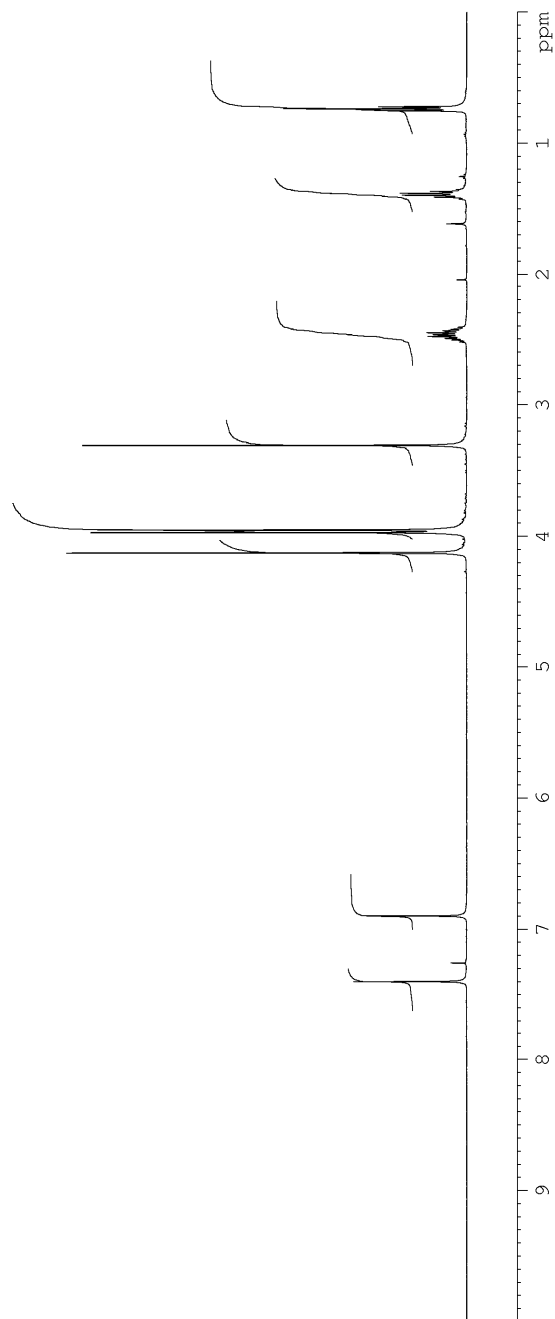

**Scheme 18.** 500 MHz <sup>1</sup>H NMR Spectrum of Compound **82** in CDCl<sub>3</sub>

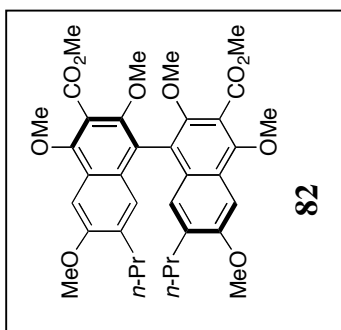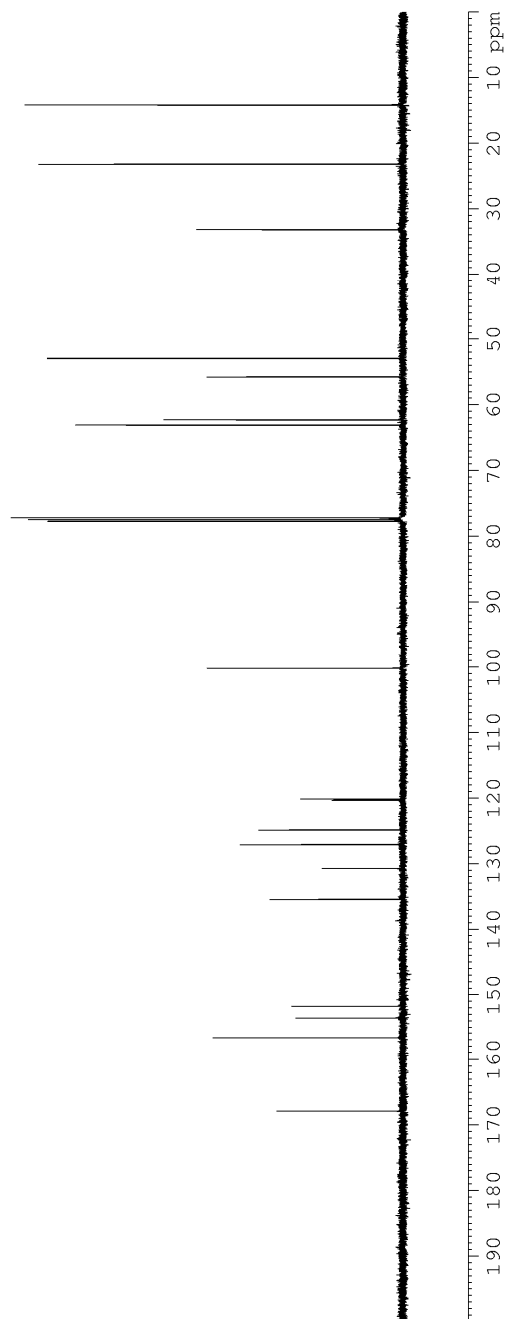

**Scheme 18.** 125 MHz <sup>13</sup>C NMR Spectrum of Compound **82** in CDCl<sub>3</sub>

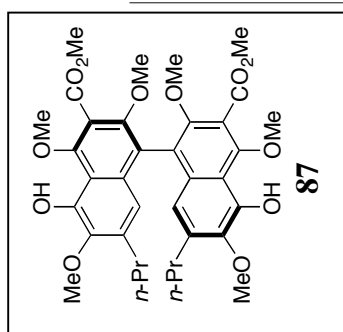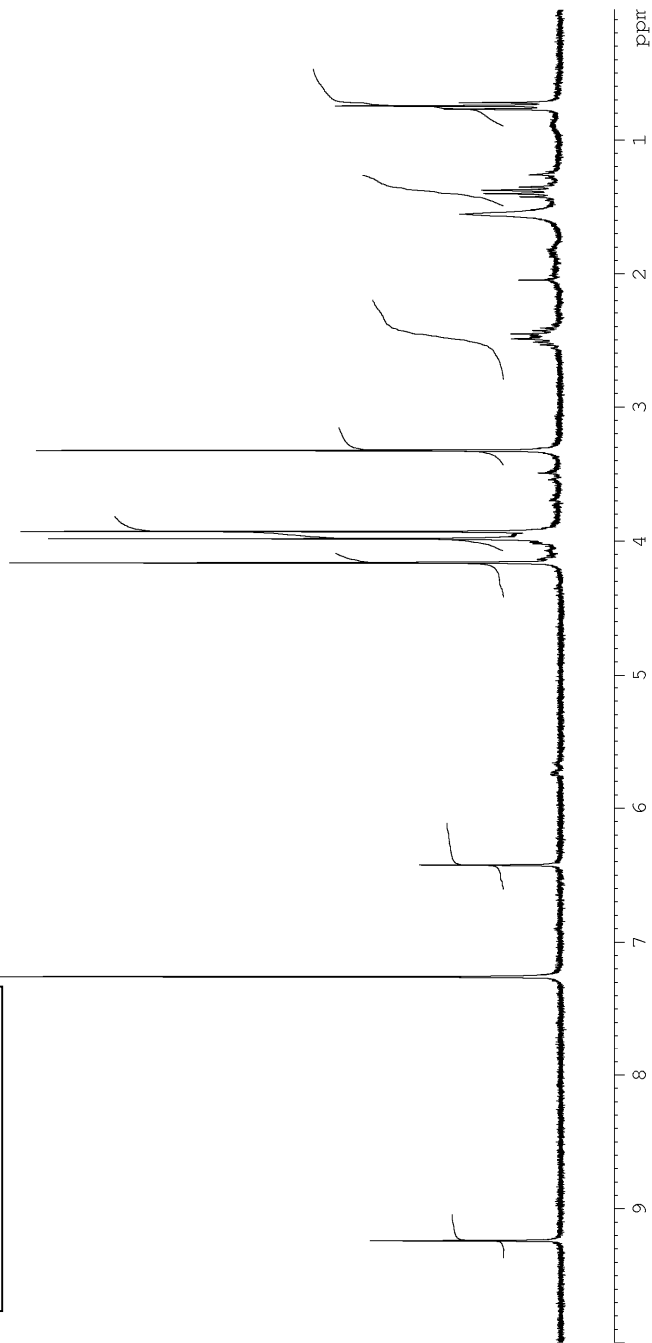

**Scheme 18.** 500 MHz  $^1\text{H}$  NMR Spectrum of Compound **87** in  $\text{CDCl}_3$

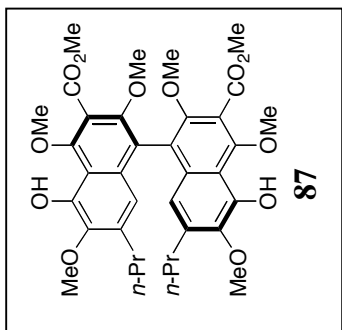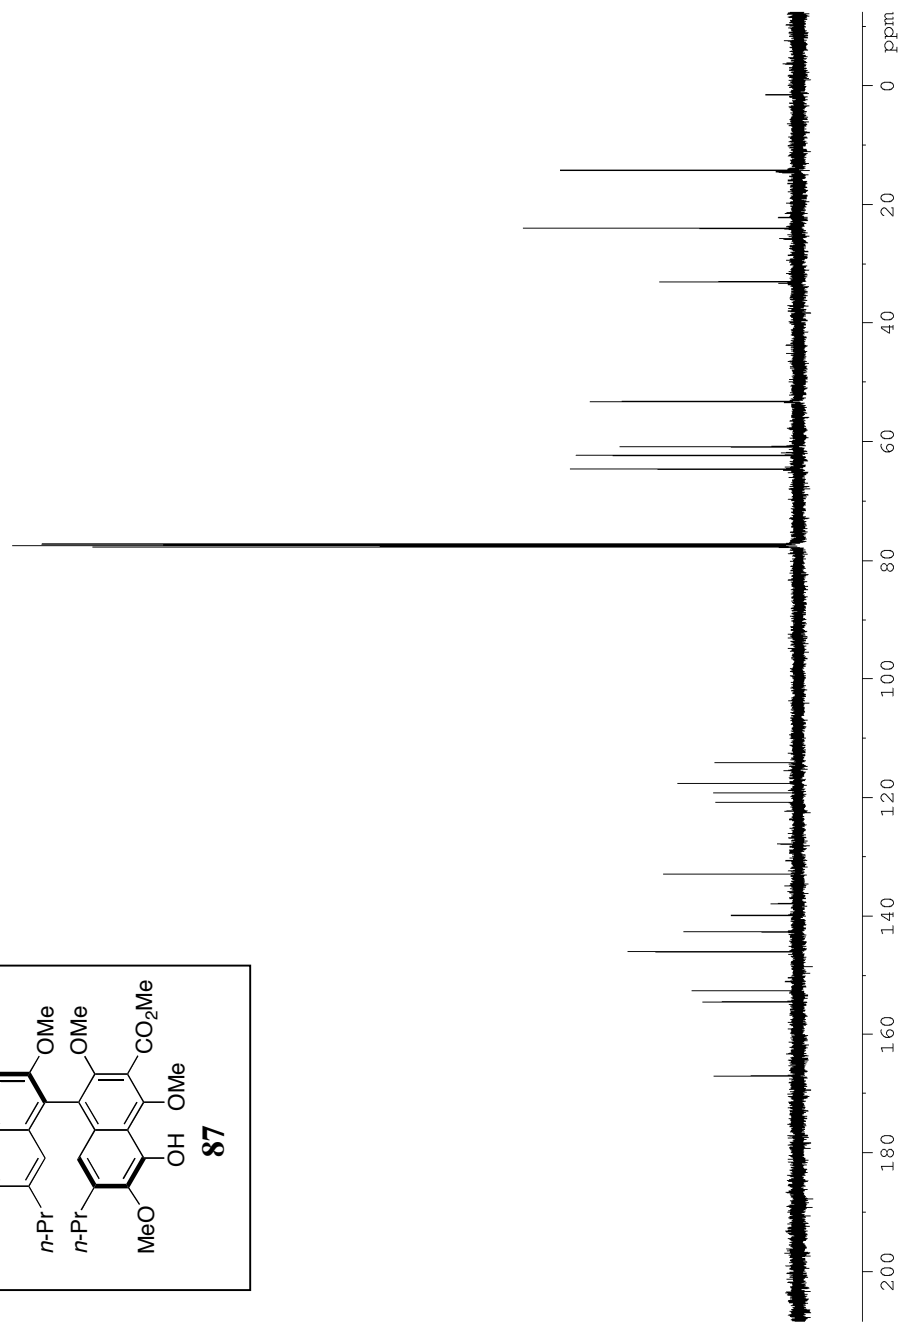

**Scheme 18.** 125 MHz  $^{13}\text{C}$  NMR Spectrum of Compound **87** in  $\text{CDCl}_3$



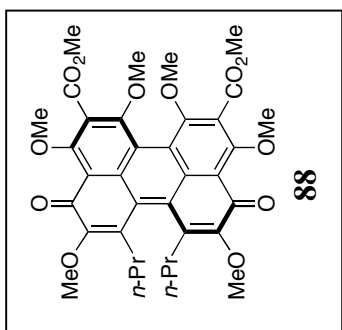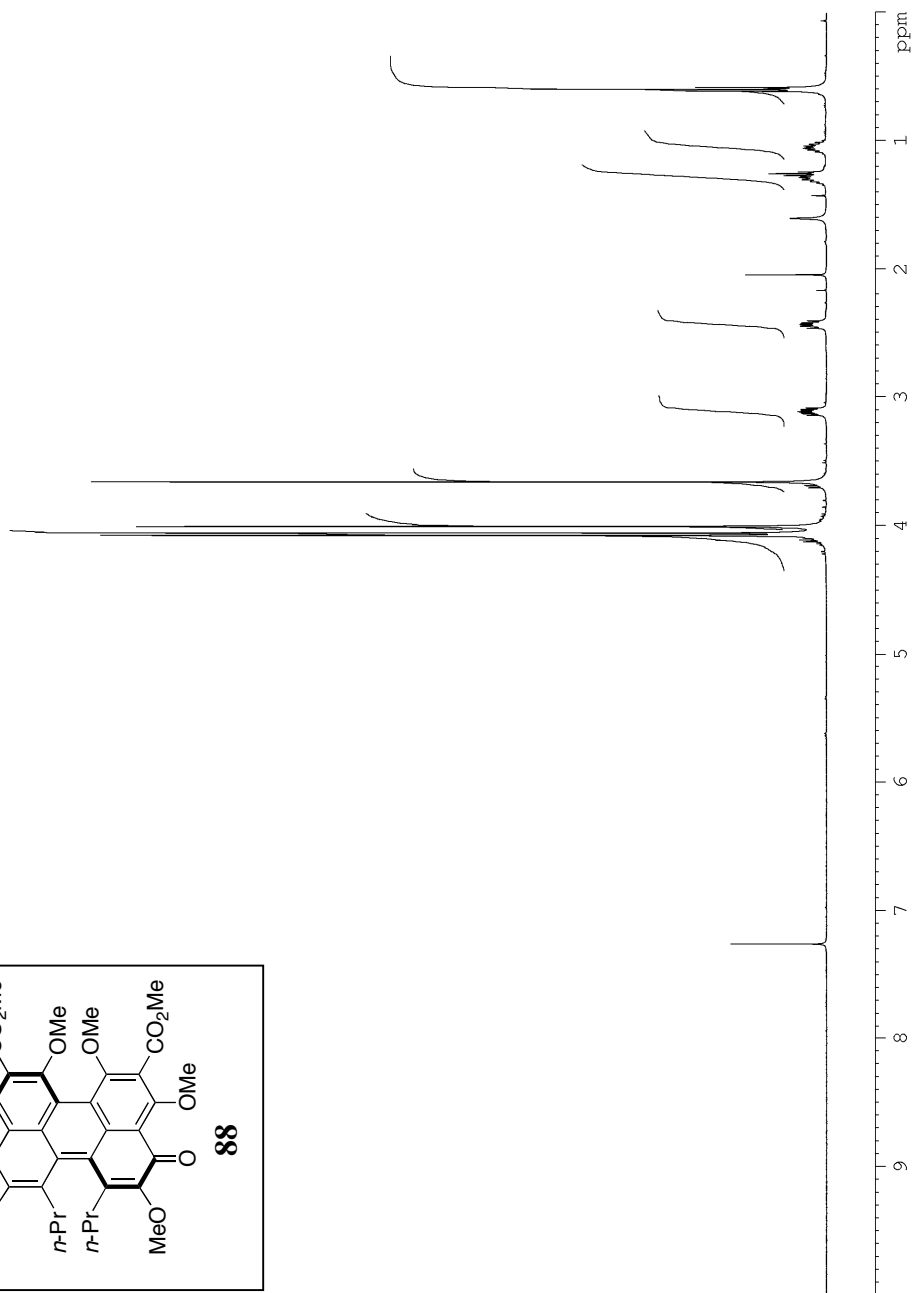

**Scheme 19.** 500 MHz  $^1\text{H}$  NMR Spectrum of Compound **88** in  $\text{CDCl}_3$

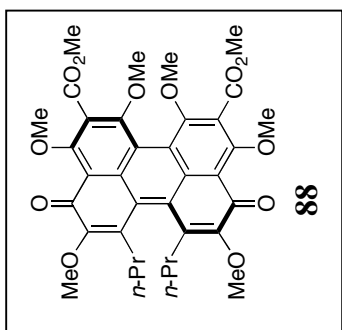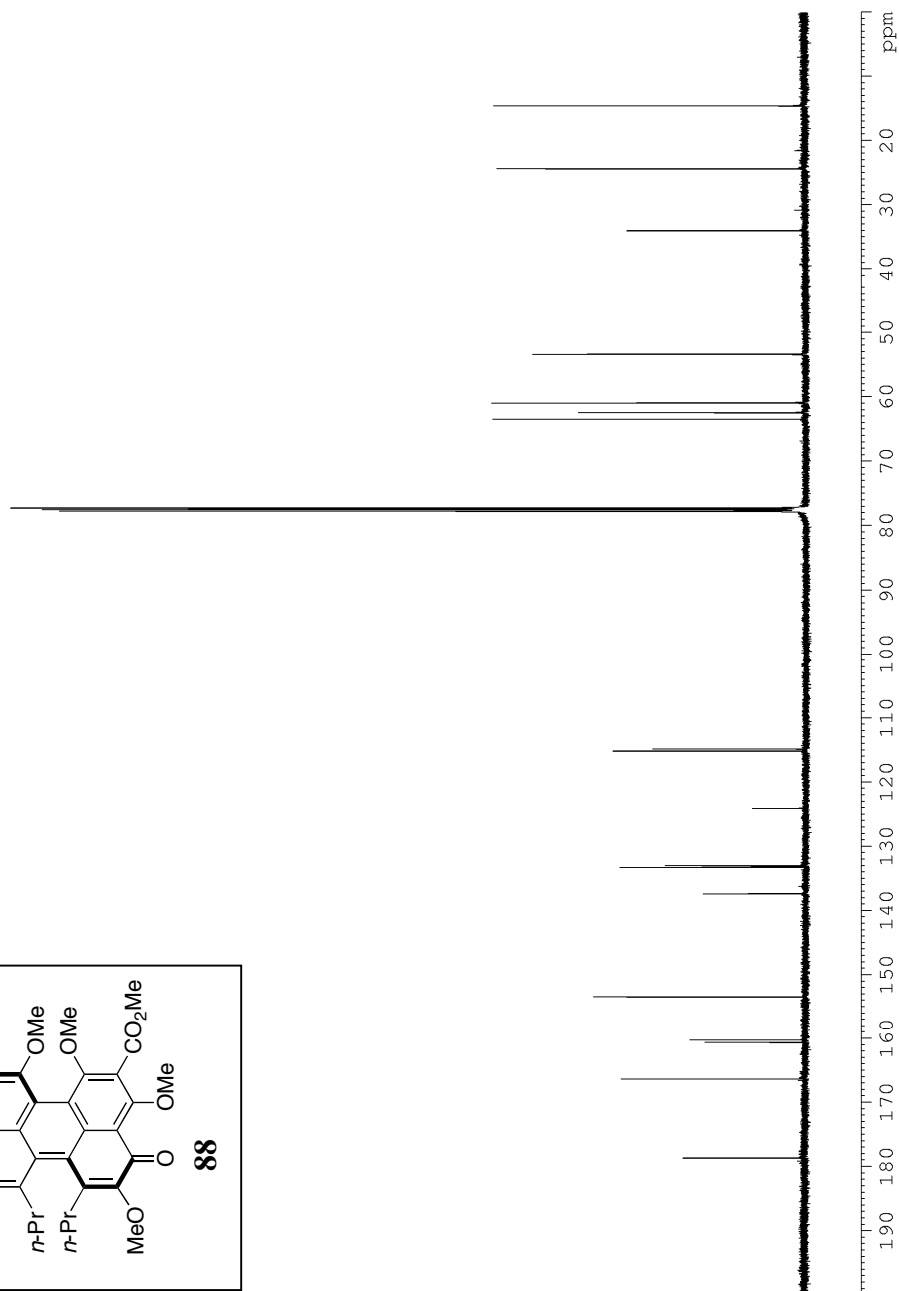

**Scheme 19.** 125 MHz  $^{13}\text{C}$  NMR Spectrum of Compound **88** in  $\text{CDCl}_3$

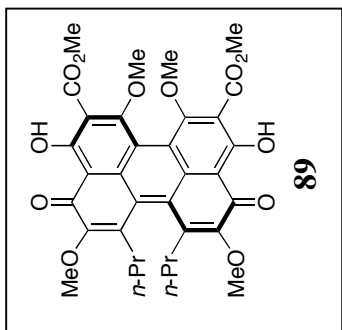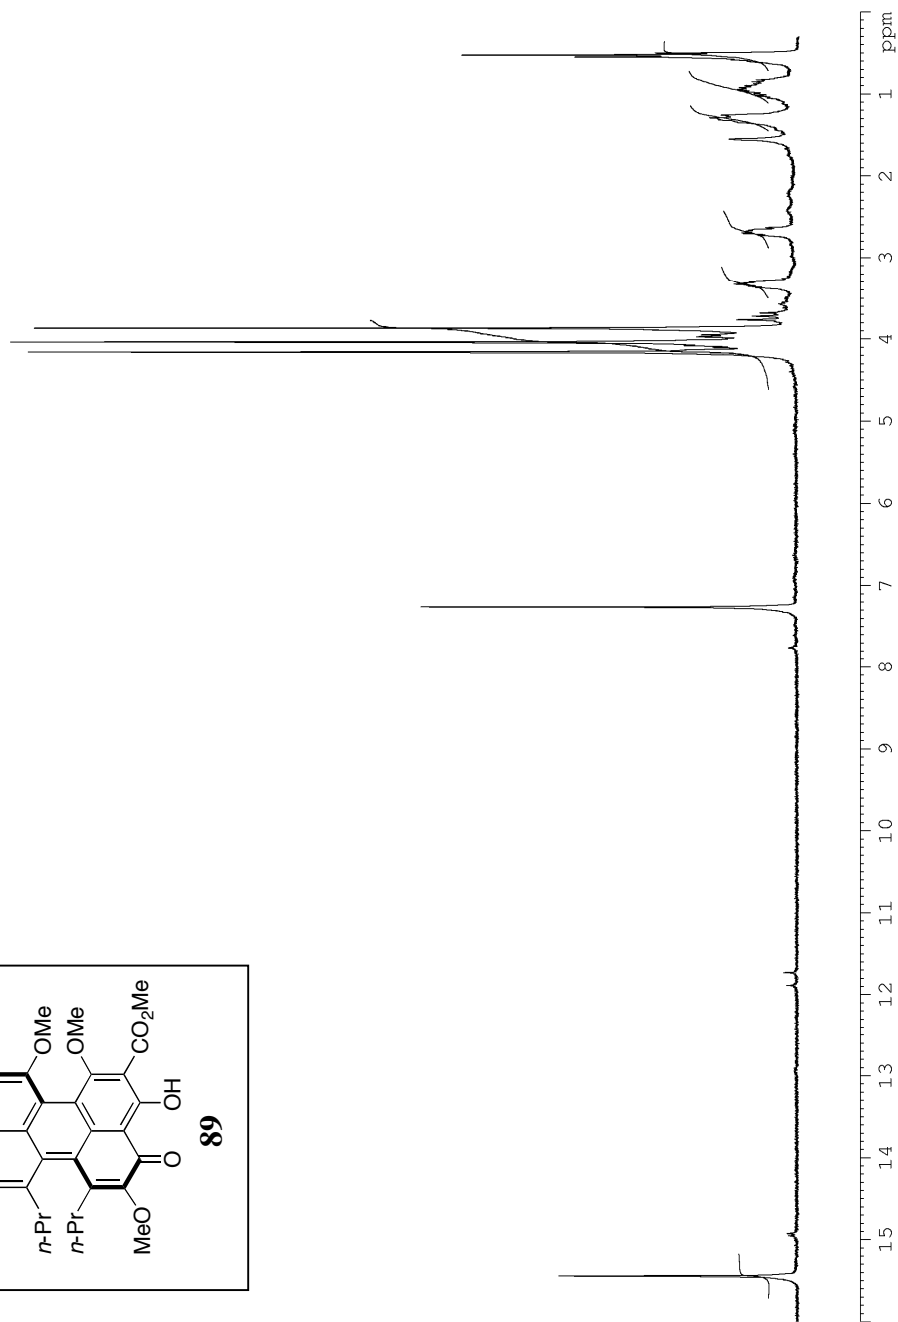

**Scheme 19.** 500 MHz  $^1\text{H}$  NMR Spectrum of Compound **89** in  $\text{CDCl}_3$

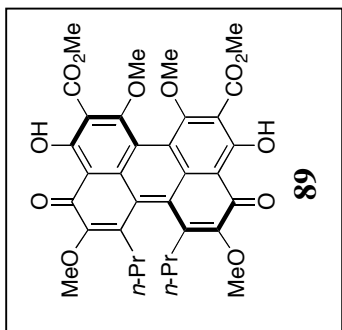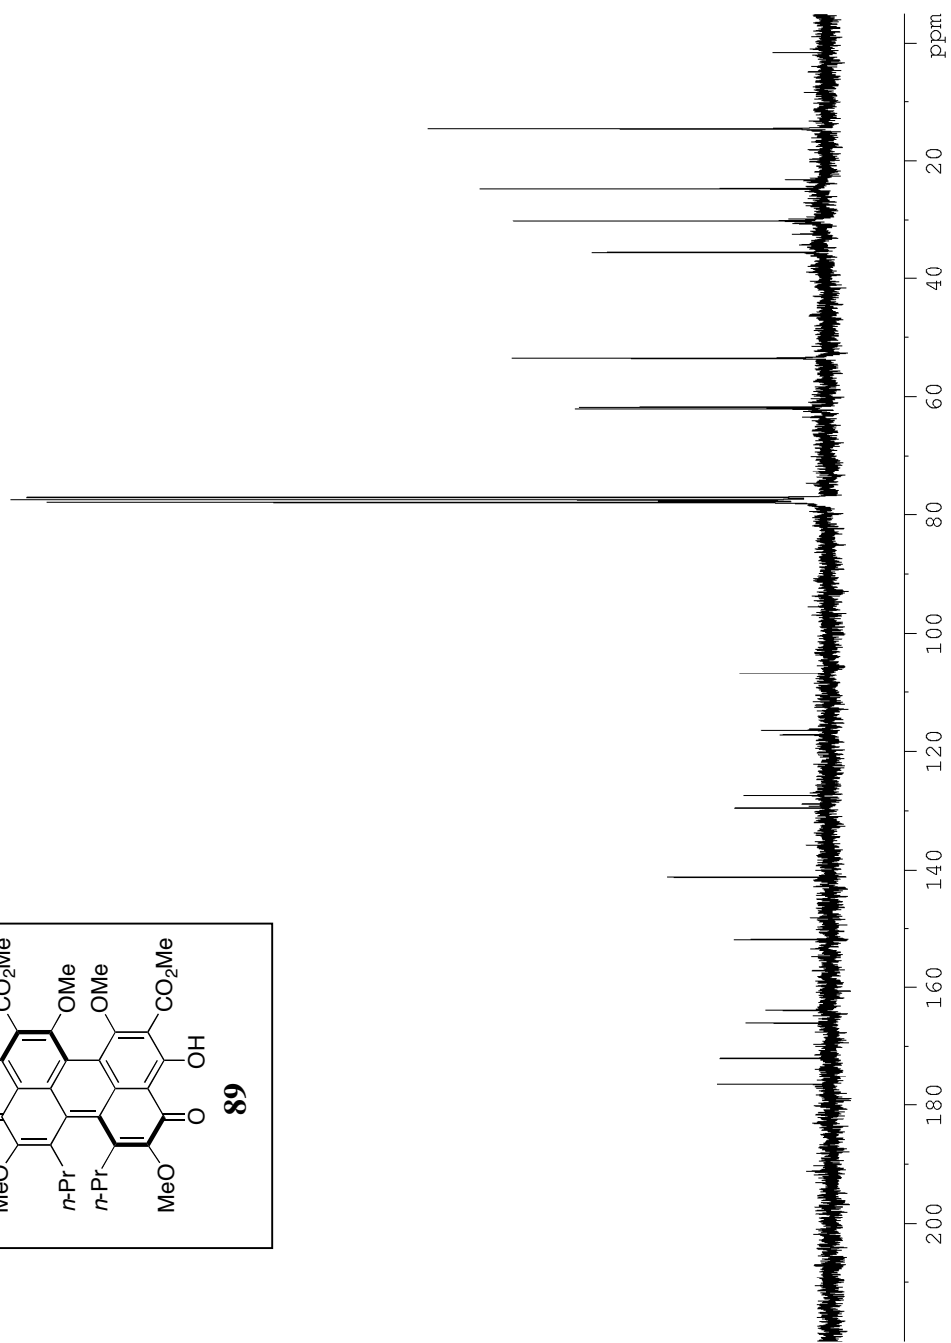

**Scheme 19.** 125 MHz  $^{13}\text{C}$  NMR Spectrum of Compound **89** in  $\text{CDCl}_3$

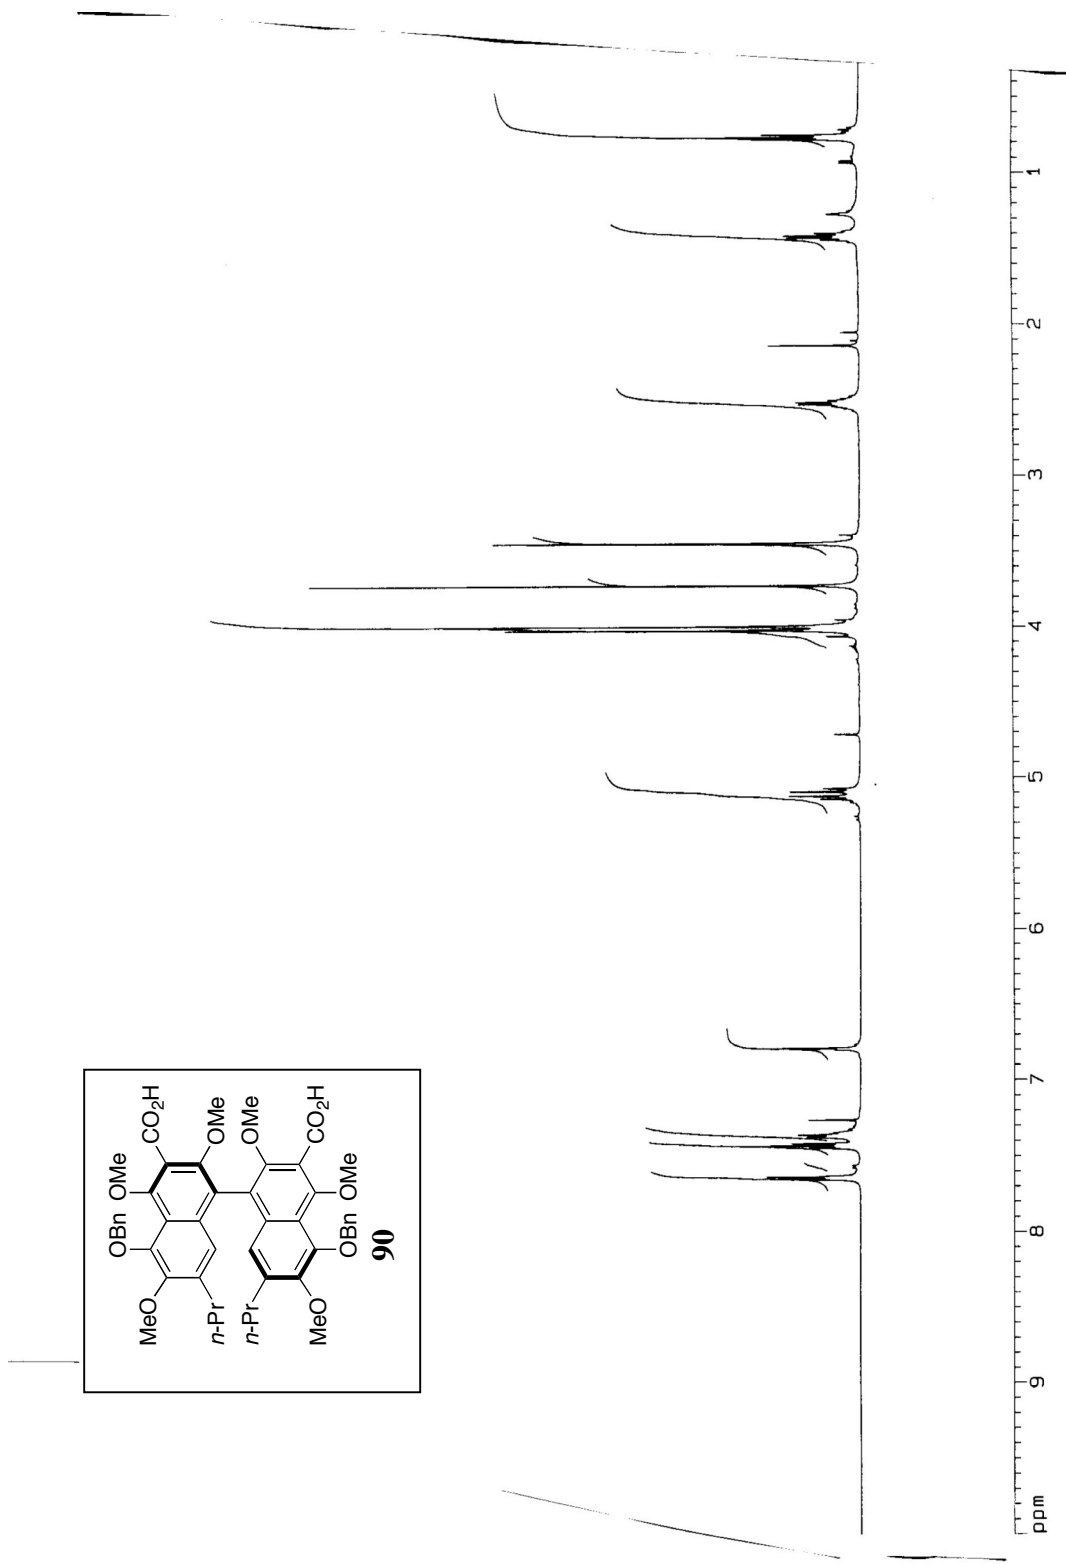

**Scheme 20.** 500 MHz <sup>1</sup>H NMR Spectrum of Compound **90** in CDCl<sub>3</sub>

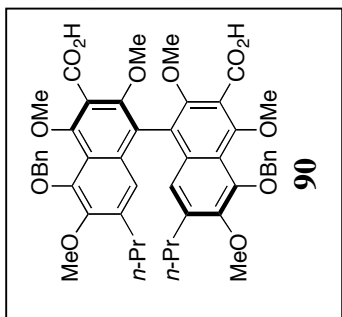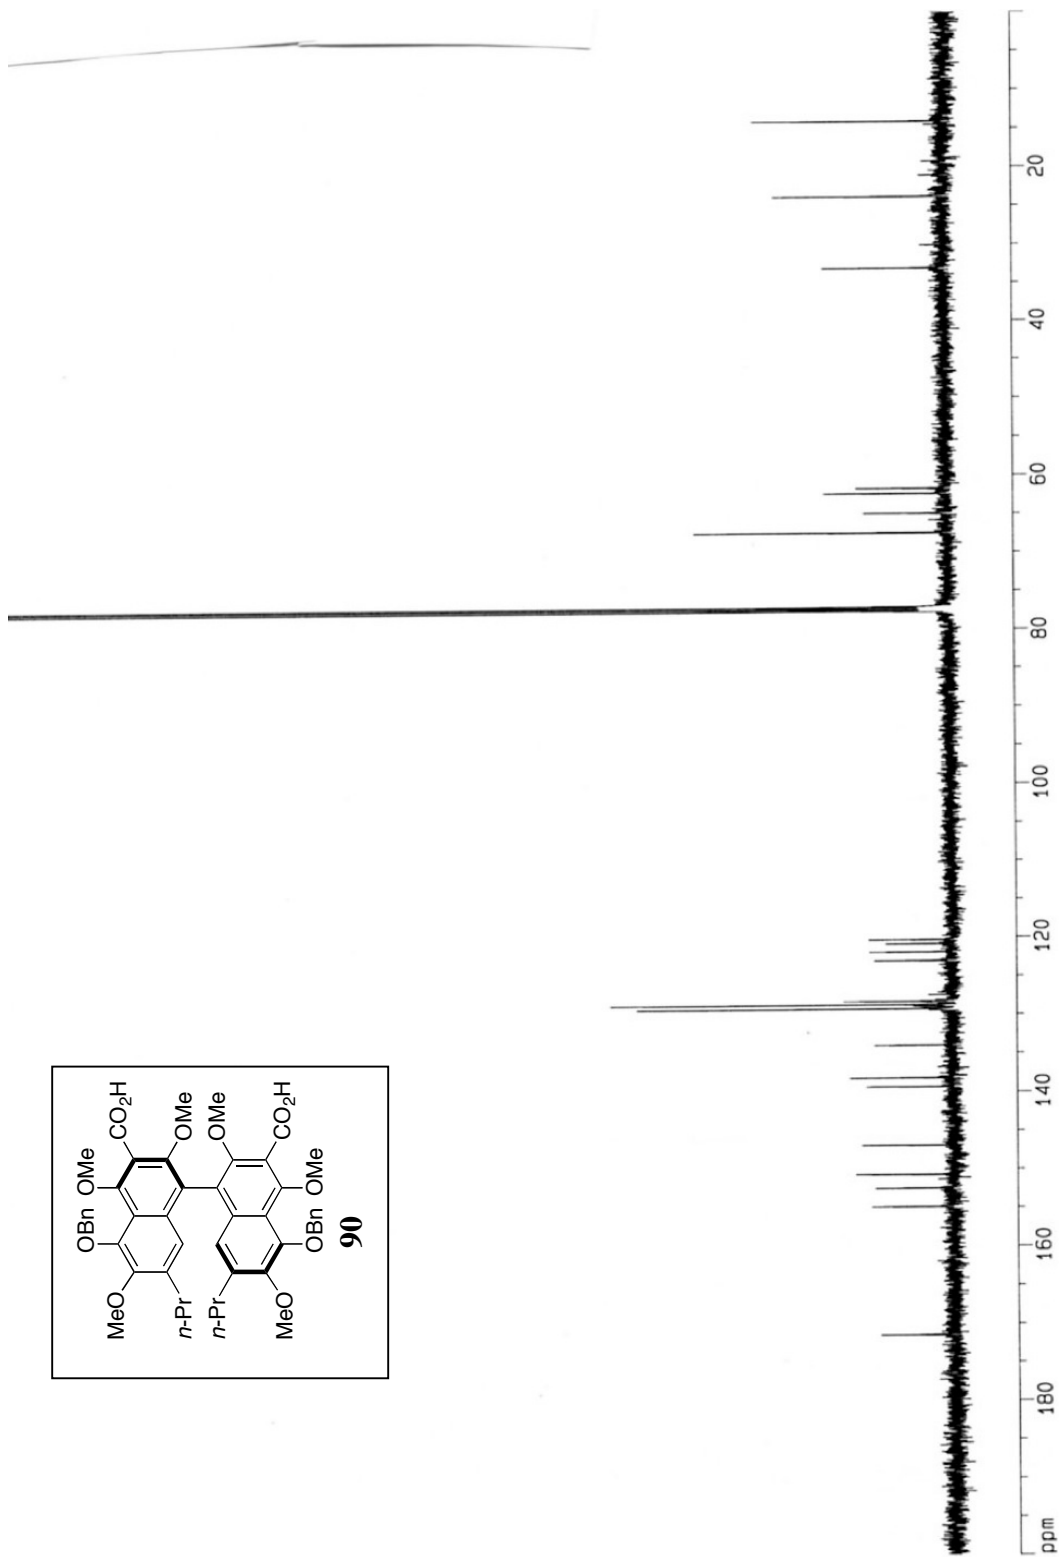

**Scheme 20.** 125 MHz  $^{13}\text{C}$  NMR Spectrum of Compound **90** in  $\text{CDCl}_3$

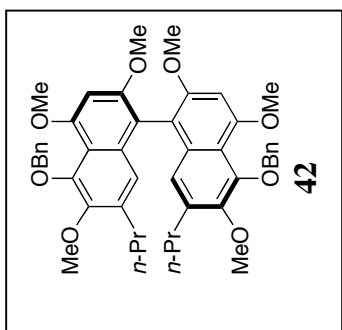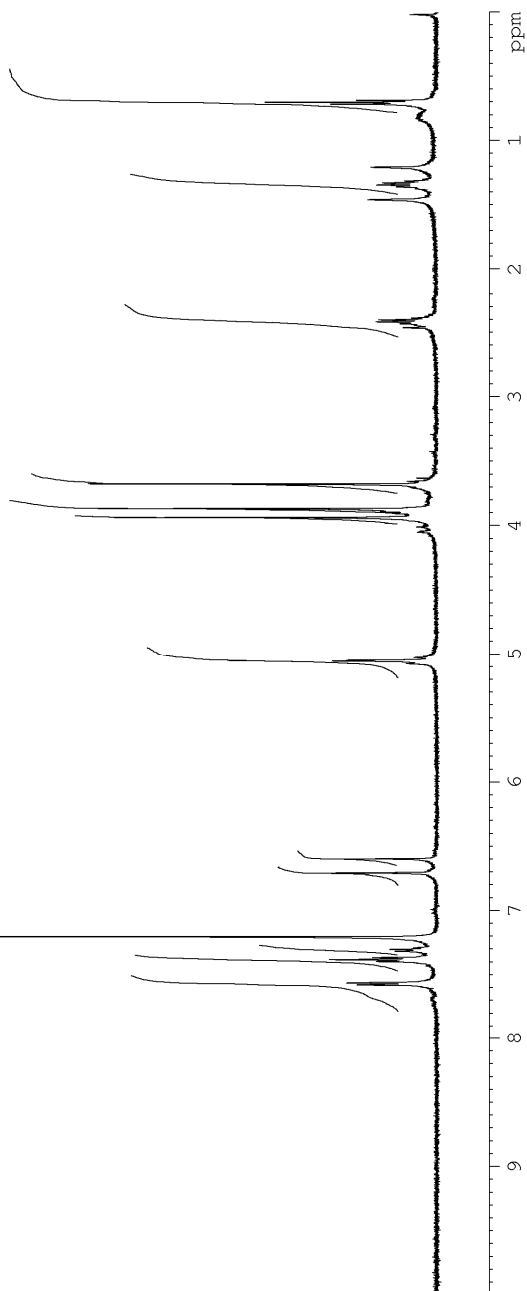

**Scheme 20.** 500 MHz  $^1\text{H}$  NMR Spectrum of Compound **42** in  $\text{CDCl}_3$

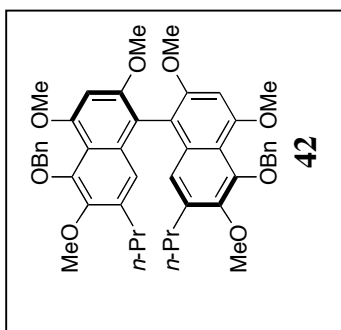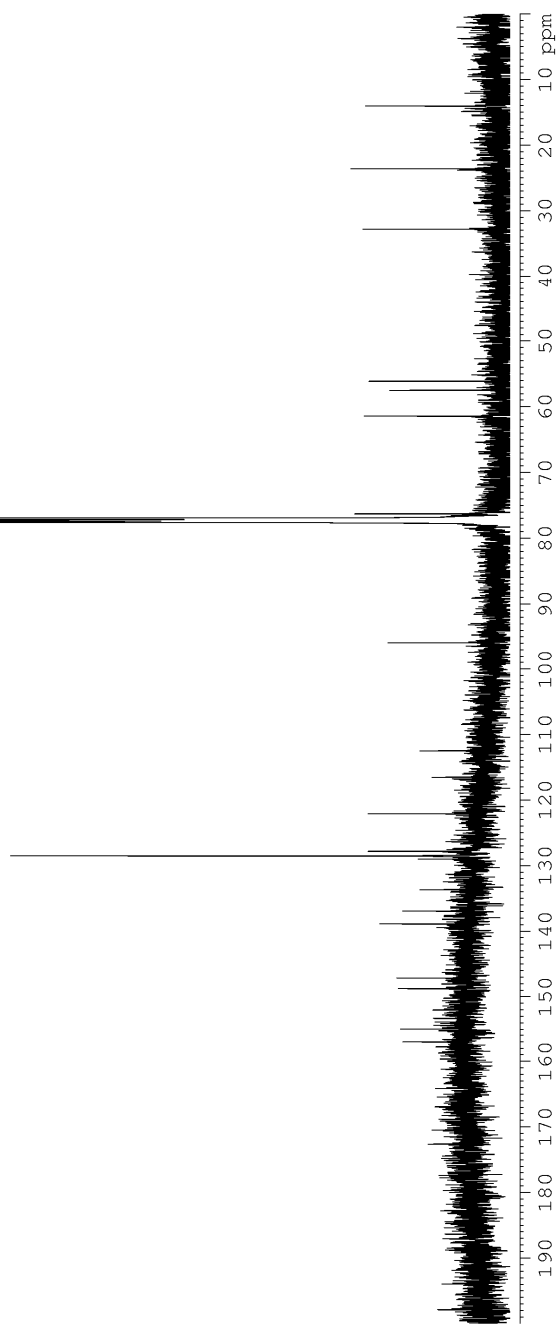

**Scheme 20.** 125 MHz  $^{13}\text{C}$  NMR Spectrum of Compound **42** in  $\text{CDCl}_3$



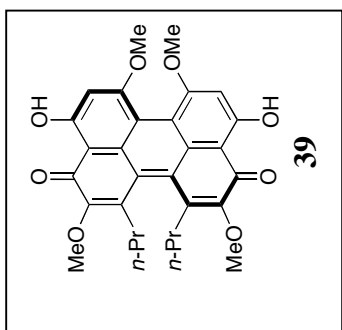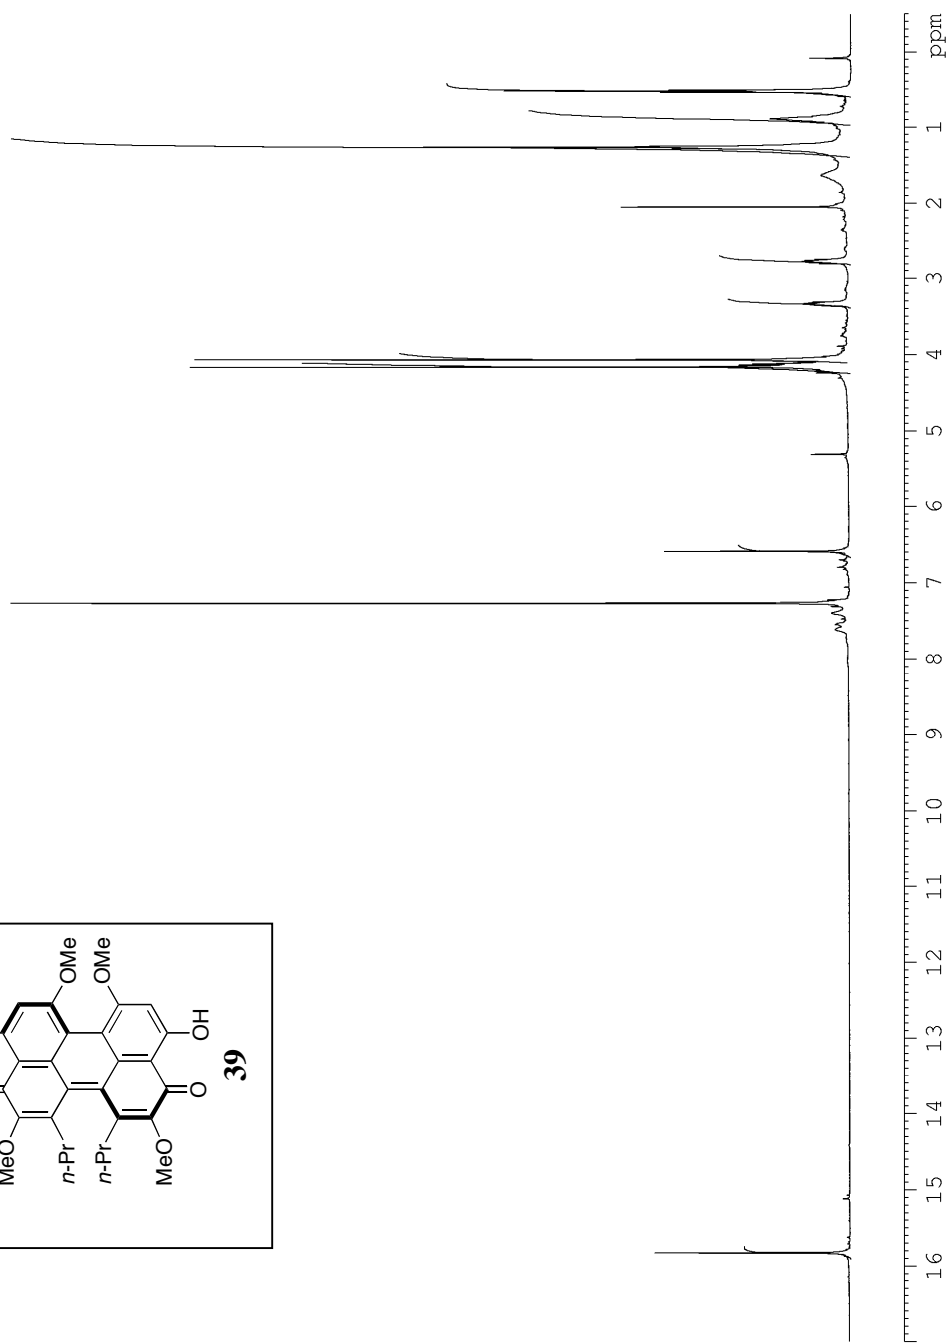

**Scheme 20.** 300 MHz  $^1\text{H}$  NMR Spectrum of Compound **39** in  $\text{CDCl}_3$

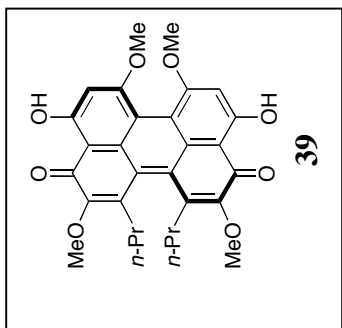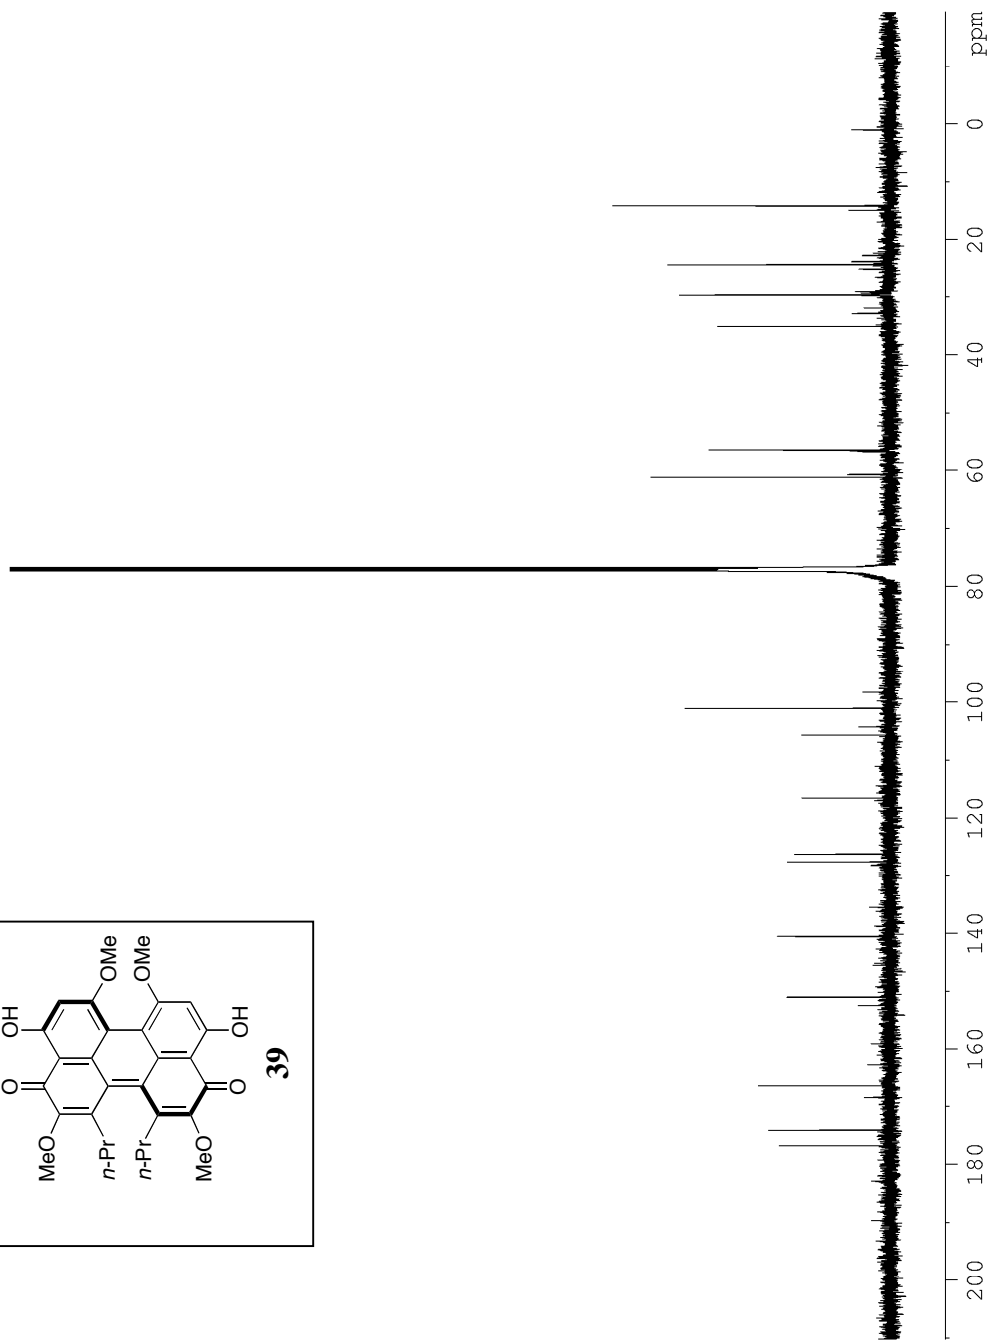

**Scheme 20.** 125 MHz  $^{13}\text{C}$  NMR Spectrum of Compound **39** in  $\text{CDCl}_3$

**CD Spectrum of 39 in MeOH, 0.3 mM.**

**CD Spectra of C7-propyl analogs (*M*)-39**

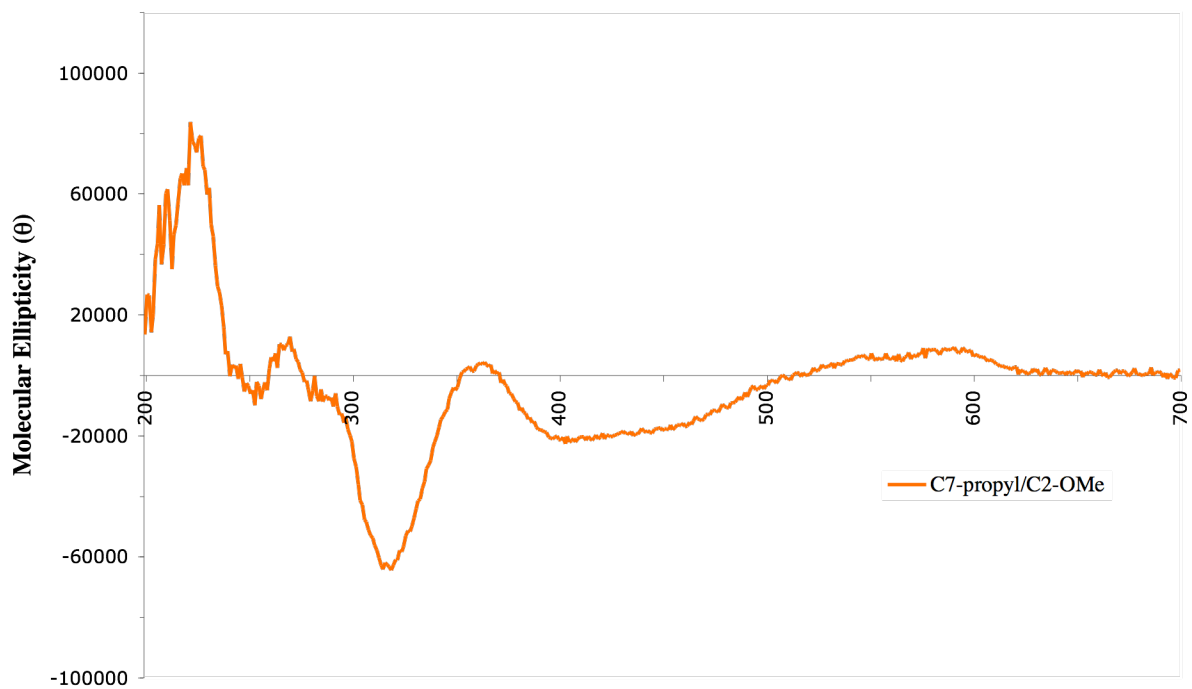

Supplement: NIHMS158347-supplement-2_si_002.pdf [file NIHMS158347-supplement-2_si_002.pdf]
